# Supplementary material for: Heparin modulates the cellular uptake of nanomedicines
Source: Royal Society of Chemistry journal article supplement (doi:10.1039/d0bm01946a), 2021-01-01
Supplement: d0bm01946a1.xlsx [file d0bm01946a1.xlsx]

## Sheet: 20201127_primary_data_CC260
				Amount (fmol)
				SDS-PS-COOH							CTMA Cl-PS-NH2							Lutensol-PS-NH2
Accession	Peptide count	Unique peptides	Description	no_hep_a	no_hep_b	no_hep_c	1 IU/mL_a	1 IU/mL_b	1 IU/mL_c		no_hep_a	no_hep_b	no_hep_c	1 IU/mL_a	1 IU/mL_b	1 IU/mL_c		no_hep_a	no_hep_b	no_hep_c	1 IU/mL_a	1 IU/mL_b	1 IU/mL_c
P04114	182	168	Apolipoprotein B-100 OS=Homo sapiens GN=APOB PE=1 SV=2	24.7286	21.5629	25.5743	18.3965	13.9944	15.3437		83.4257	83.9038	89.4993	98.0382	94.8541	100.081		64.0514	8.21755	58.0459	44.2477	54.0715	51.1903
P01024	94	83	Complement C3 OS=Homo sapiens GN=C3 PE=1 SV=2	303.388	320.122	356.747	258.703	239.19	236.588		36.761	39.1107	39.359	23.0196	24.7396	18.5458		137.544	12.5339	264.852	163.588	87.7612	75.0235
P02768	61	59	Serum albumin OS=Homo sapiens GN=ALB PE=1 SV=2	123.129	111.061	138.163	114.039	84.0382	83.321		1470.55	1454.42	1576.83	1837.36	1775.65	1944.18		107.96	4.26805	81.9989	84.3698	109.932	107.699
P08603;Q02985	46	40	Complement factor H OS=Homo sapiens GN=CFH PE=1 SV=4	221.21	202.984	254.746	206.893	163.312	162.952		6.47078	6.43069	6.75107	7.16258	7.14845	7.59779		15.6655	2.12849	16.282	12.8145	13.2097	12.6769
P06727	40	39	Apolipoprotein A-IV OS=Homo sapiens GN=APOA4 PE=1 SV=3	68.0733	58.8828	72.5808	50.6025	35.4853	37.3531		81.3542	81.7632	89.0968	102.34	99.5892	111.676		29.3857	11.6604	31.3212	39.2588	40.479	39.9172
Q14624	32	31	Inter-alpha-trypsin inhibitor heavy chain H4 OS=Homo sapiens GN=ITIH4 PE=1 SV=4	97.4173	95.0829	110.823	92.8325	74.1499	72.1984		15.8116	16.1524	15.5975	11.5168	12.217	12.6497		10.0236	4.19993	10.361	9.33351	9.77618	9.29221
P00734	33	30	Prothrombin OS=Homo sapiens GN=F2 PE=1 SV=2	78.6422	79.2555	89.0894	77.4166	60.9349	61.1346		89.067	88.0002	91.2602	105.938	102.701	107.591		8.99903	9.1538	9.86892	5.59107	6.60366	6.75508
P02751	33	30	Fibronectin OS=Homo sapiens GN=FN1 PE=1 SV=4	31.6275	30.9378	35.9958	29.5629	24.3296	25.5305		5.16719	4.78159	5.49066	2.37391	2.50777	2.54333		7.75388	0.89505	6.3957	7.97053	7.21533	7.31876
P02649	31	29	Apolipoprotein E OS=Homo sapiens GN=APOE PE=1 SV=1	25.0042	24.0561	28.5462	21.5757	19.5016	19.0106		35.3104	32.7491	32.8625	57.5171	60.4388	74.5393		56.077	0	55.461	40.1482	44.8157	53.8176
P01008	31	27	Antithrombin-III OS=Homo sapiens GN=SERPINC1 PE=1 SV=1	32.968	28.561	37.0964	22.4225	17.264	18.8689		41.2224	42.7491	44.9475	54.6409	53.4943	60.1044		13.9537	20.5899	13.2259	11.6167	14.7747	14.8504
P10909	29	27	Clusterin OS=Homo sapiens GN=CLU PE=1 SV=1	197.841	176.651	217.194	196.458	153.625	154.897		319.319	325.33	337.548	188.815	181.919	199.086		4115.29	2.87649	3898.03	3141.7	3558.88	3427.78
P02647	27	27	Apolipoprotein A-I OS=Homo sapiens GN=APOA1 PE=1 SV=1	118.505	108.328	139.717	104.095	82.2553	87.4537		210.236	206.371	220.916	261.244	258.386	281.692		294.465	12.9018	275.821	327.986	375.411	357.936
P00747	27	26	Plasminogen OS=Homo sapiens GN=PLG PE=1 SV=2	16.2138	14.8128	19.0949	13.4334	9.9881	13.1339		16.9509	16.8044	18.1781	17.5628	17.3537	18.4977		33.2601	3.55241	34.1008	25.1589	31.3242	30.6956
P01031	25	25	Complement C5 OS=Homo sapiens GN=C5 PE=1 SV=4	43.9887	42.8292	53.1775	40.3386	32.0682	33.344		2.84178	2.7642	2.82041	2.05475	2.38965	2.66023		4.5726	9.51779	0.779246	4.02601	1.05505	1.04377
P01042	24	22	Kininogen-1 OS=Homo sapiens GN=KNG1 PE=1 SV=2	117.884	116.251	131.984	119.173	90.1237	90.78		19.2881	21.6449	22.0298	20.1024	21.6941	23.2514		12.4214	2.38089	11.5702	9.96721	13.0768	12.9611
P04003	25	20	C4b-binding protein alpha chain OS=Homo sapiens GN=C4BPA PE=1 SV=2	55.7239	48.2421	62.1924	43.9435	28.8037	30.8285		135.576	136.204	145.209	57.3123	57.6872	62.1114		6.27957	14.0587	5.9181	5.46287	6.54555	6.31795
P03952	20	20	Plasma kallikrein OS=Homo sapiens GN=KLKB1 PE=1 SV=1	12.3712	11.1612	13.6728	11.4653	8.54441	9.39176		8.53317	8.60989	9.08446	7.90022	6.12052	6.97462		26.8694	0.912763	24.8274	21.5687	19.6417	20.2164
P01871;P04220	20	19	Ig mu chain C region OS=Homo sapiens GN=IGHM PE=1 SV=3	43.9759	40.5092	48.1083	40.8907	29.0106	30.3567		52.0189	49.0645	52.5626	46.1455	45.0493	46.9522		12.4656	6.56257	10.194	11.0223	12.7076	12.2868
P04004	20	19	Vitronectin OS=Homo sapiens GN=VTN PE=1 SV=1	160.481	166.536	184.56	161.132	140.473	143.681		245.06	251.486	265.889	184.944	178.697	190.905		40.469	4.44838	47.0916	32.0248	32.8755	30.8138
P02774	21	18	Vitamin D-binding protein OS=Homo sapiens GN=GC PE=1 SV=1	16.9847	13.6845	19.5676	14.8067	12.4969	15.6871		41.852	51.0907	52.4357	45.5697	52.6213	55.819		10.7193	8.38627	8.30377	8.30576	9.55071	9.11532
P06396	21	18	Gelsolin OS=Homo sapiens GN=GSN PE=1 SV=1	64.1554	66.9682	76.6042	72.3144	59.7265	61.7276		14.9043	15.5284	15.5418	11.7887	12.1922	11.5043		14.0432	3.801	12.8293	11.5717	12.6413	11.9567
P09871	17	16	Complement C1s subcomponent OS=Homo sapiens GN=C1S PE=1 SV=1	22.9364	25.2356	28.2243	24.3052	19.9982	20.5		13.5527	13.6536	13.6212	6.68313	6.96417	7.46432		2.82717	7.2242	2.26258	2.36528	4.3027	4.34783
P13671	17	15	Complement component C6 OS=Homo sapiens GN=C6 PE=1 SV=3	13.9767	13.2517	13.7899	12.1674	10.9054	10.9928		5.0047	5.32041	4.85005	2.32462	2.96035	2.81942		2.80926	7.79598	2.84127	2.43193	2.80046	2.46276
P00736	16	15	Complement C1r subcomponent OS=Homo sapiens GN=C1R PE=1 SV=2	22.9936	19.2162	23.074	21.2191	15.6992	17.2614		9.23495	8.68191	8.84213	3.75848	4.55468	5.81614		1.38544	1.44343	1.54468	2.62192	2.35364	2.66132
P02749	12	12	Beta-2-glycoprotein 1 OS=Homo sapiens GN=APOH PE=1 SV=3	294.473	251.086	321.994	304.398	217.326	233.318		14.8485	12.4059	14.8782	22.5809	18.4149	23.8387		2.67031	10.9715	2.87486	3.40972	4.40901	3.61036
P07996	16	11	Thrombospondin-1 OS=Homo sapiens GN=THBS1 PE=1 SV=2	5.91452	6.09913	5.5161	5.72201	4.5789	4.55707		9.05508	9.54719	9.38786	4.74041	5.32971	4.13738		0	0.118548	0.581266	0.0659907	0.102244	0.132568
P01009	11	11	Alpha-1-antitrypsin OS=Homo sapiens GN=SERPINA1 PE=1 SV=3	28.6759	30.9446	32.5047	30.277	25.1032	23.7417		23.6614	24.6168	25.6878	13.0588	13.6041	13.9854		78.6196	9.51972	62.0075	73.6926	97.0913	92.4416
P19823	11	11	Inter-alpha-trypsin inhibitor heavy chain H2 OS=Homo sapiens GN=ITIH2 PE=1 SV=2	19.385	15.2904	19.7278	18.0106	13.7303	14.9918		27.6075	24.4984	27.8445	27.8728	25.2694	27.0423		3.17861	3.93635	3.97658	7.14772	5.83664	6.40023
P00751	14	10	Complement factor B OS=Homo sapiens GN=CFB PE=1 SV=2	32.7021	30.9035	38.5681	28.1998	24.7916	25.2401		3.3547	2.62911	3.15716	1.68464	1.85671	1.90435		3.08453	0.860609	3.39167	2.92687	1.86349	1.64981
P02748	12	10	Complement component C9 OS=Homo sapiens GN=C9 PE=1 SV=2	11.7324	11.0729	12.3817	10.6578	9.46312	9.84093		26.4261	23.7648	26.2061	24.5181	20.6614	19.5927		1.86433	12.4778	1.72144	4.8723	3.09432	3.17292
P03951	11	10	Coagulation factor XI OS=Homo sapiens GN=F11 PE=1 SV=1	2.52855	3.78531	2.15882	2.36775	2.01776	2.97677		0.879205	1.09373	1.01851	0.947704	1.02362	0.997398		0.149262	12.2996	0.278741	0.166355	0.495213	0.50289
P35858	11	10	Insulin-like growth factor-binding protein complex acid labile subunit OS=Homo sapiens GN=IGFALS PE=1 SV=1	9.79812	7.10762	9.47901	8.01009	6.38163	6.63622		10.0645	8.86521	9.7225	10.8736	9.7019	10.1534		19.3867	8.09323	19.6368	18.2201	18.8232	19.3717
P07225	11	9	Vitamin K-dependent protein S OS=Homo sapiens GN=PROS1 PE=1 SV=1	14.8187	9.87134	12.8572	9.74196	7.07341	7.3876		9.13061	10.2071	10.307	3.6249	3.44336	4.17205		0.673495	0.577832	0.722322	0.668224	0.822769	0.605227
P04196	10	9	Histidine-rich glycoprotein OS=Homo sapiens GN=HRG PE=1 SV=1	19.2799	23.2267	24.2472	30.3644	29.8469	29.4537		0.128664	0.0916515	0.0447561	0.0414592	0.0672194	0.204986		0.0328619	6.90394	0.0382962	0	0	0
P05155	10	9	Plasma protease C1 inhibitor OS=Homo sapiens GN=SERPING1 PE=1 SV=2	33.8569	25.9524	32.4705	28.9259	21.3493	22.1095		30.7293	29.9004	33.0211	25	23.0805	25.6031		33.2126	0.414402	32.3309	33.9511	31.2884	31.6162
P10643	10	9	Complement component C7 OS=Homo sapiens GN=C7 PE=1 SV=2	21.8322	19.785	22.4416	15.919	11.3627	12.5851		15.6395	15.8403	16.8635	17.6869	17.4684	19.4301		8.50065	3.05469	6.53728	9.87862	10.4837	10.7155
P01876;P01877	9	9	Ig alpha-1 chain C region OS=Homo sapiens GN=IGHA1 PE=1 SV=2	23.6257	20.6146	25.7428	24.4215	18.3859	19.0541		15.0286	15.9738	15.8176	7.01272	7.1215	7.03879		2.67193	0.656327	4.06048	2.84172	3.67531	3.97265
P51884	9	9	Lumican OS=Homo sapiens GN=LUM PE=1 SV=2	4.31664	5.17791	4.19998	4.31725	4.05075	3.70885		19.8247	19.9322	20.7366	19.1009	19.3834	18.9885		3.63763	2.15428	3.09423	3.81194	5.0751	4.71129
P18428	8	7	Lipopolysaccharide-binding protein OS=Homo sapiens GN=LBP PE=1 SV=3	5.02761	5.54277	5.56311	8.49077	5.76133	5.13591		0.434453	0.469917	0.281043	0.475243	0.597062	0.572103		0.376207	18.3549	0.690627	1.16724	0.827904	0.966912
P01834	7	7	Ig kappa chain C region OS=Homo sapiens GN=IGKC PE=1 SV=1	84.5706	92.6738	98.9824	83.5628	73.4445	74.9675		37.2231	38.1526	39.0067	16.3276	18.1796	18.0363		5.78444	2.56556	9.09845	7.05146	8.10094	7.7779
P02766	7	7	Transthyretin OS=Homo sapiens GN=TTR PE=1 SV=1	7.50322	7.85607	8.47831	7.46295	7.35805	7.60113		10.0085	10.3554	10.6468	4.47347	4.37355	4.79916		1.82982	0.063755	1.26709	1.33965	1.55635	1.56165
P05154	7	7	Plasma serine protease inhibitor OS=Homo sapiens GN=SERPINA5 PE=1 SV=3	6.22436	8.15196	7.02918	7.35111	7.32159	7.31497		2.11326	1.90626	1.81966	1.77432	1.90538	1.99001		3.2619	4.23386	4.78435	4.15408	2.31359	2.39888
P05546	7	7	Heparin cofactor 2 OS=Homo sapiens GN=SERPIND1 PE=1 SV=3	8.05073	9.46031	8.62631	8.67097	8.87381	9.03083		16.94	21.155	20.4337	18.1274	19.3863	17.2864		96.1299	1.50926	228.407	83.297	52.1544	49.7459
P0CG05;P0CG06;B9A064;P0CG04;P0CF74;A0M8Q6	7	7	Ig lambda-2 chain C regions OS=Homo sapiens GN=IGLC2 PE=1 SV=1	17.0838	20.9775	34.1289	12.0043	23.2761	22.959		46.2046	24.667	27.9922	28.3036	21.8495	26.9707		2.80297	0	6.54096	7.31201	5.88331	7.00618
P55058	7	7	Phospholipid transfer protein OS=Homo sapiens GN=PLTP PE=1 SV=1	7.85235	7.25595	8.40594	6.34876	5.82635	6.24943		8.06634	7.77501	7.80298	8.62014	8.7996	8.6495		16.5756	2.35445	12.9595	13.0601	13.8411	13.5513
P00739	10	6	Haptoglobin-related protein OS=Homo sapiens GN=HPR PE=2 SV=2	5.78124	4.80028	5.60346	8.45095	5.91124	5.61775		6.754	6.29268	6.80796	5.98619	4.03641	4.44734		3.98555	36.7573	3.55682	5.36955	4.83018	4.89723
P02743	7	6	Serum amyloid P-component OS=Homo sapiens GN=APCS PE=1 SV=2	16.6514	12.5291	16.6719	14.7592	11.1634	11.5906		0.65888	0.513943	0.646655	0.699724	0.784729	0.764963		0	0.227744	0.716322	0.144215	0.234253	0.093959
P02760	6	6	Protein AMBP OS=Homo sapiens GN=AMBP PE=1 SV=1	21.1945	17.3915	24.2868	10.1141	7.59371	8.40482		4.47223	4.75669	4.80074	4.24631	4.27463	4.52489		9.69878	0	6.87586	6.51215	7.82501	7.94035
P19827	6	6	Inter-alpha-trypsin inhibitor heavy chain H1 OS=Homo sapiens GN=ITIH1 PE=1 SV=3	14.5643	11.1289	14.6525	12.6283	11.1175	12.0529		4.39045	4.28156	4.02755	2.22902	2.11894	2.44679		0.481221	0.282527	0.4827	0.474369	0.210221	0.131067
P00738	12	5	Haptoglobin OS=Homo sapiens GN=HP PE=1 SV=1	13.1778	12.0094	13.5709	16.6309	13.1038	12.5559		15.5767	16.0784	16.8957	11.7911	12.1531	12.8936		4.10392	115.742	4.46823	4.69162	5.63457	5.89694
P00740	7	5	Coagulation factor IX OS=Homo sapiens GN=F9 PE=1 SV=2	4.02999	3.40241	4.09344	4.02572	3.1265	3.20677		1.39291	1.54521	1.47178	0.953427	0.827288	0.860558		0.0370616	1.39455	0.44634	0.114535	0.320776	0.196255
P01023	7	5	Alpha-2-macroglobulin OS=Homo sapiens GN=A2M PE=1 SV=3	0.838136	0.855289	0.924817	0.823559	0.708561	0.54918		0.761126	0.702599	0.755944	0.55938	0.70003	0.621383		0.676327	8.20756	1.27848	0.828687	0.757975	0.86534
P49908	7	5	Selenoprotein P OS=Homo sapiens GN=SELENOP PE=1 SV=3	8.46511	8.681	8.49071	7.23035	5.67855	6.23814		9.19647	9.63311	9.04389	7.78027	7.75368	8.2001		13.6827	1.46879	9.87186	9.06924	11.9821	11.2006
Q14520	6	5	Hyaluronan-binding protein 2 OS=Homo sapiens GN=HABP2 PE=1 SV=1	7.89811	5.06583	6.18496	7.39982	5.57212	5.76228		9.2952	7.96064	9.54696	6.31483	7.61459	8.18645		7.60211	0	6.65015	8.79373	8.86513	8.6799
P02652	5	5	Apolipoprotein A-II OS=Homo sapiens GN=APOA2 PE=1 SV=1	1.21174	2.18294	1.56645	0.810949	1.84221	1.40879		5.16283	6.42996	4.13572	1.75179	8.28238	12.1673		4.0786	5.15631	4.21374	4.12371	5.03643	7.90674
P02746	5	5	Complement C1q subcomponent subunit B OS=Homo sapiens GN=C1QB PE=1 SV=3	56.9332	51.7901	65.6107	52.0108	39.0361	38.5382		2.6548	2.69729	3.06943	4.99861	5.35712	6.169		0.263368	0.412829	0.25082	0.2503	0.494211	0.424109
P01860	11	4	Ig gamma-3 chain C region OS=Homo sapiens GN=IGHG3 PE=1 SV=2	14.136	15.4227	16.413	13.8412	12.4898	12.6031		5.06706	5.31423	5.6612	5.15794	5.24482	4.30505		5.84417	2.16232	10.9852	4.96462	4.43948	4.81698
Q03591	10	4	Complement factor H-related protein 1 OS=Homo sapiens GN=CFHR1 PE=1 SV=2	21.1431	17.4403	22.9001	17.1479	11.9582	12.5278		38.682	37.7351	41.3869	47.7419	44.4512	49.4354		14.4531	4.17398	11.4752	16.8956	21.5419	20.7815
P68871;P02100;P69891;P69892	6	4	Hemoglobin subunit beta OS=Homo sapiens GN=HBB PE=1 SV=2	9.40658	8.74733	9.80108	6.64102	6.41664	7.13369		5.54638	5.5566	5.78994	3.60629	4.28674	4.41721		20.7931	0.0803706	14.0437	18.9334	15.5704	23.7714
O43866	5	4	CD5 antigen-like OS=Homo sapiens GN=CD5L PE=1 SV=1	0.592774	0.904283	0.819744	1.82502	1.67258	1.64477		0.104359	0.0696942	0.0489055	0.0709225	0.0155526	0		0	0	0.0402759	0.058909	0	0.0588746
Q9BXR6	5	4	Complement factor H-related protein 5 OS=Homo sapiens GN=CFHR5 PE=1 SV=1	4.39806	3.82484	4.5982	5.38835	4.15058	3.20162		0.427918	0.565057	0.461032	0.455123	0.385848	0.371464		0	0.767797	0.295449	0.0539708	0.155812	0.126418
O95445	4	4	Apolipoprotein M OS=Homo sapiens GN=APOM PE=1 SV=2	1.69992	0.729951	1.47937	1.9535	1.65344	1.29854		0.71154	0.783231	0.817806	0.751453	0.473267	0.686782		0.942841	0	0.819318	1.29573	1.32033	1.29115
P07357	4	4	Complement component C8 alpha chain OS=Homo sapiens GN=C8A PE=1 SV=2	3.8583	3.96153	5.04415	4.20223	3.28372	2.9576		0.14407	0.214345	0.0782995	0	0	0		0	0.574395	0.0297037	0	0	0
P0C0L5	39	3	Complement C4-B OS=Homo sapiens GN=C4B PE=1 SV=2	17.9467	16.5248	18.5733	16.2157	14.665	14.3908		46.185	45.5722	48.0211	47.4751	45.1104	48.8722		21.603	4.26352	19.3938	18.3614	21.3033	21.2248
P0C0L4	38	3	Complement C4-A OS=Homo sapiens GN=C4A PE=1 SV=2	9.46955	8.71929	9.80014	8.55617	7.73795	7.59329		24.3694	24.0461	25.3382	25.0502	23.8024	25.7873		11.3988	2.24964	10.2331	9.68838	11.2406	11.1992
P60709;P63261;P68032;P63267;P68133	10	3	Actin_ cytoplasmic 1 OS=Homo sapiens GN=ACTB PE=1 SV=1	0.424144	0.525515	0.356883	0.34555	0.487694	0.389929		0.0269786	0.0431552	0.0436271	0	0	0.0537292		1.69127	0.700247	2.84831	2.51178	2.26265	2.9865
P01857	9	3	Ig gamma-1 chain C region OS=Homo sapiens GN=IGHG1 PE=1 SV=1	39.6149	37.1079	43.7737	36.339	28.4162	29.4868		23.3664	24.0278	24.9984	31.415	31.3711	34.0785		32.8146	14.5401	25.2763	24.3826	28.5452	27.6357
P01859	9	3	Ig gamma-2 chain C region OS=Homo sapiens GN=IGHG2 PE=1 SV=2	5.06931	5.03409	5.55493	5.95885	5.61532	5.56924		1.9083	2.42548	2.0292	1.01692	1.23725	1.04095		0.973028	0.908319	0.855277	0.920559	1.39671	1.05018
P00748	5	3	Coagulation factor XII OS=Homo sapiens GN=F12 PE=1 SV=3	6.37412	4.58319	6.87973	8.17973	4.90142	5.37424		0.0887201	0.0647953	0.1051	0	0.037675	0.0507101		0.0817559	1.00214	0.137265	0.199077	0.0715294	0.21974
P05090	4	3	Apolipoprotein D OS=Homo sapiens GN=APOD PE=1 SV=1	0.721733	0.425266	0.405738	0.290216	0.510989	0.546568		0.337872	0.440476	0.341952	0.387983	0.561851	0.431071		0.174218	0.0205152	0.24493	0.443662	0.443349	0.362753
O14791	3	3	Apolipoprotein L1 OS=Homo sapiens GN=APOL1 PE=1 SV=5	6.6571	4.95767	5.87659	7.53845	7.34276	5.89555		12.281	9.4922	10.1894	7.58145	6.41946	7.07123		85.6227	0.482076	76.6577	42.0187	44.3774	44.2077
P02790	3	3	Hemopexin OS=Homo sapiens GN=HPX PE=1 SV=2	14.7183	15.4827	16.9611	13.4088	12.1342	12.2158		12.6137	12.2779	12.9841	17.0933	17.2383	19.4226		28.8992	0.920092	23.7882	20.9391	23.6052	23.0252
P27918	3	3	Properdin OS=Homo sapiens GN=CFP PE=1 SV=2	1.04329	1.05313	0.971417	2.07471	1.73377	1.68252		0.129881	0.236304	0.100266	0.0397013	0.10992	0.0501365		0	0	0.462566	0.488628	0.311291	0.356348
Q14166	3	3	Tubulin--tyrosine ligase-like protein 12 OS=Homo sapiens GN=TTLL12 PE=1 SV=2	8.66957	10.371	9.98488	12.2247	11.1444	11.057		8.93168	13.7253	10.9045	1.24929	1.56878	1.78498		0.365994	0.35741	0.427464	0.573808	0.439487	0.520002
Q9BW19	3	3	Kinesin-like protein KIFC1 OS=Homo sapiens GN=KIFC1 PE=1 SV=2	1.60057	1.58145	1.67647	1.00066	1.16408	0.92291		2.49603	2.26248	2.57551	2.8927	2.87948	3.14757		1.2443	6.59112	1.08616	1.42194	2.09278	1.68919
A5A3E0	4	2	POTE ankyrin domain family member F OS=Homo sapiens GN=POTEF PE=1 SV=2	4.37386	0.604712	6.14601	12.1168	11.9767	11.4361		3.26844	3.38993	3.31456	0.751414	0.862528	1.15956		0.692729	0	1.8834	1.93632	2.36695	2.82457
P00742	4	2	Coagulation factor X OS=Homo sapiens GN=F10 PE=1 SV=2	2.51821	1.76267	2.30025	2.40167	1.8503	1.76692		1.7262	1.64755	1.88795	2.04346	1.71278	1.75685		4.58992	0.492252	4.20614	3.92029	4.23181	4.1053
P02747	4	2	Complement C1q subcomponent subunit C OS=Homo sapiens GN=C1QC PE=1 SV=3	64.2411	52.9056	67.0549	61.7397	42.4677	45.679		25.4457	24.4782	27.142	48.6554	44.1753	47.7622		4.77115	14.585	5.21726	8.3219	10.0869	10.4882
P02765	4	2	Alpha-2-HS-glycoprotein OS=Homo sapiens GN=AHSG PE=1 SV=1	4.68353	4.1982	5.56421	11.5257	7.79848	9.46535		1.74376	2.13741	1.46723	1.59421	1.44257	0.565438		0.104438	3.082	0.0667208	0.0960745	0.229054	0.283275
P29622	4	2	Kallistatin OS=Homo sapiens GN=SERPINA4 PE=1 SV=3	77.9303	48.5153	78.647	67.1783	39.9914	41.514		48.9954	46.7618	50.2842	45.0141	41.4944	44.0508		40.3763	17.9301	40.3125	35.4471	39.8164	40.5542
Q8N5H3	3	2	Protein FAM89B OS=Homo sapiens GN=FAM89B PE=1 SV=2	8.4622	9.64811	10.2812	8.5458	7.93418	8.4754		5.81515	6.01913	6.58591	6.45399	7.19109	7.45545		7.36391	1.77642	16.1795	7.89318	9.64043	8.78228
Q9H1K0	3	2	Rabenosyn-5 OS=Homo sapiens GN=RBSN PE=1 SV=2	0	0.0105429	0	0.00718376	0.371606	0.0703729		0.0541215	0.350658	0.0563673	0	0.0163385	0		0	0	0	0	0.0693067	0.0211223
O00217	2	2	NADH dehydrogenase [ubiquinone] iron-sulfur protein 8_ mitochondrial OS=Homo sapiens GN=NDUFS8 PE=1 SV=1	0.669902	9.7117	0.185292	7.75253	6.13618	0.62779		33.7814	10.5734	6.01556	3.31759	5.29152	10.5622		0	0.0692858	0	0.0922504	0	0.00149184
O14556	2	2	Glyceraldehyde-3-phosphate dehydrogenase_ testis-specific OS=Homo sapiens GN=GAPDHS PE=1 SV=2	6.69176	5.27041	6.04297	6.70875	6.11666	6.21675		8.81202	7.62979	9.18098	7.37255	6.42678	7.1768		14.9305	2.23388	13.6837	15.1543	15.1113	15.6933
P02656	2	2	Apolipoprotein C-III OS=Homo sapiens GN=APOC3 PE=1 SV=1	3.13142	3.85545	3.91771	3.16144	4.53063	4.73117		1.88717	2.11043	1.64341	1.51569	1.34196	3.71475		3.2633	45.2886	2.34794	4.36664	3.88703	4.12047
P02775	2	2	Platelet basic protein OS=Homo sapiens GN=PPBP PE=1 SV=3	6.55231	6.33519	6.23635	7.38206	6.62072	6.75765		0.319226	0.4235	0.377674	0.344922	0.303247	0.357744		0	0.0970333	0.0503807	0.853002	0.903306	0.750204
P11226	2	2	Mannose-binding protein C OS=Homo sapiens GN=MBL2 PE=1 SV=2	2.22446	1.94229	2.19409	1.63288	1.4227	1.24496		1.8973	1.7054	1.80242	2.41478	2.3198	2.21617		8.20784	0.196861	6.83813	5.23342	6.78338	6.8659
P78562	2	2	Phosphate-regulating neutral endopeptidase OS=Homo sapiens GN=PHEX PE=1 SV=1	21.6698	26.9761	25.6824	23.9702	19.3967	20.2447		4.13757	4.15658	4.5459	4.14006	4.2869	1.89493		0.503224	1.07687	0.317803	0.0421843	0.544871	0.445226
P82650	2	2	28S ribosomal protein S22_ mitochondrial OS=Homo sapiens GN=MRPS22 PE=1 SV=1	3.10602	3.75106	2.29164	1.67526	3.24797	3.32716		4.35498	4.71898	4.17129	3.9829	4.30332	4.89556		7.53282	1.87684	5.41684	7.02552	5.97043	5.43321
Q8IYF1	2	2	Elongin-A2 OS=Homo sapiens GN=ELOA2 PE=1 SV=2	7.25103	4.82802	6.21078	7.12039	4.53257	5.50193		5.57617	5.08018	5.28774	2.81945	2.92693	2.47543		20.1319	0.422934	17.8673	20.8965	18.6286	18.9497
				3105.27	2916.57	3482.11	2944.35	2359.97	2410.67		3678.43	3633.39	3860.74	3782.68	3686.64	4008.78		5697.71	559.202	5641.22	4619.99	5083.12	4923.93
P00761	6	6	Trypsin OS=Sus scrofa PE=1 SV=1	60.0744	52.2434	66.7094	42.1317	32.3703	33.6537		77.2669	76.5737	82.0402	95.6492	92.4781	101.38		265.592	19.7542	238.548	182.515	193.272	187.897
Proteins below NOT used for proteomics analysis
Peptide count = 1
A6NCN2;O43790;P78385;Q14533	1	1	Putative keratin-87 protein OS=Homo sapiens GN=KRT87P PE=5 SV=4	0.186661	0.196259	0.189897	0.341952	0.319886	0.252642		0.0827768	0.0519416	0.0524455	0.213024	0.355059	0.149454		0	0.229214	0.100452	0	0	0.105926
A6NN73;Q08AF8;Q0D2H9	1	1	Golgin subfamily A member 8C OS=Homo sapiens GN=GOLGA8CP PE=3 SV=2	0	0	0	0	0.0373105	0.0239828		0.0553667	0.0498048	0	0	0	0		18.8411	0	16.4591	16.7993	18.4121	17.5493
O15144	1	1	Actin-related protein 2/3 complex subunit 2 OS=Homo sapiens GN=ARPC2 PE=1 SV=1	0	0	0	0	0	0		0	0	0	0	0	0		0	0	0	0	0	0
P01767	1	1	Immunoglobulin heavy variable 3-53 OS=Homo sapiens GN=IGHV3-53 PE=1 SV=2	3.61634	1.60062	3.30967	3.55182	2.17133	2.44521		2.41061	1.55143	2.07266	0.379935	0.273636	0.744161		0	0	0	0.0576814	0	0
P02787	1	1	Serotransferrin OS=Homo sapiens GN=TF PE=1 SV=3	1.89345	1.83234	2.1655	1.82625	1.4598	1.54261		0.0640879	0.157393	0.0757848	0	0.0836609	0.195603		0	7.60173	0	0	0	0
P08727	1	1	Keratin_ type I cytoskeletal 19 OS=Homo sapiens GN=KRT19 PE=1 SV=4	0	0	0	0	0	0		0	0	0	0	0	0		0	0	0	0	0	0
P13987	1	1	CD59 glycoprotein OS=Homo sapiens GN=CD59 PE=1 SV=1	2.18315	5.47665	1.70364	1.81253	3.7757	3.71752		0	0	0	0	0	0		0	156.155	0	0	0	0
P17936	1	1	Insulin-like growth factor-binding protein 3 OS=Homo sapiens GN=IGFBP3 PE=1 SV=2	2.59292	1.9259	2.92791	3.13016	2.15694	2.36309		0	0	0	0	0	0		0	0	0	0	0	0
P31268	1	1	Homeobox protein Hox-A7 OS=Homo sapiens GN=HOXA7 PE=2 SV=3	0	0	0	0	0	0		8.95596	0	0	0	0.585371	3.61947		0	0	0.114444	0	0	0
P52736	1	1	Zinc finger protein 133 OS=Homo sapiens GN=ZNF133 PE=1 SV=2	2.18313	2.44722	2.60638	1.94357	1.6478	2.16892		2.34533	2.91679	3.16917	2.9385	3.38553	3.40819		10.4581	0.126842	10.1512	7.24869	8.88198	7.54828
Q02325	1	1	Plasminogen-like protein B OS=Homo sapiens GN=PLGLB1 PE=3 SV=1	0	0	0	0.0236069	0.0332405	0		0.0157926	0.086225	0.191419	0.297	0.112415	0.240268		0	0	0	0.0504583	0.0827993	0
Q16609	1	1	Putative apolipoprotein(a)-like protein 2 OS=Homo sapiens GN=LPAL2 PE=5 SV=1	18.0524	17.6885	20.468	13.058	11.9497	12.9357		19.6308	19.6962	20.3082	24.3775	23.9299	25.86		79.934	1.41373	52.3516	50.8962	67.2605	64.2017
Q75MW2	1	1	Protein ZNF767 OS=Homo sapiens GN=ZNF767P PE=5 SV=1	10.894	15.9477	13.979	13.006	13.0218	12.6226		16.6697	16.1124	16.7112	10.363	10.6421	12.2646		0	3.4133	0	0.0770337	0	0.145051
Q8N543	1	1	Prolyl 3-hydroxylase OGFOD1 OS=Homo sapiens GN=OGFOD1 PE=1 SV=1	1.08431	1.28695	0.768414	0.40062	0.155032	0.541795		0	0	0.0554552	0	0	0		0.371004	0	0.433995	0.84812	1.1082	1.2433
Q8TBK2	1	1	N-lysine methyltransferase SETD6 OS=Homo sapiens GN=SETD6 PE=1 SV=2	3.61654	1.2364	1.80885	1.42674	3.18422	2.6539		2.90048	3.10718	3.47401	3.54093	4.03366	3.90353		13.6101	0	10.5441	10.1884	12.1481	12.1896
Q8WUA2	1	1	Peptidyl-prolyl cis-trans isomerase-like 4 OS=Homo sapiens GN=PPIL4 PE=1 SV=1	4.01933	3.86034	4.49699	4.90126	4.12372	4.65189		0	0	0.0697919	0	0	0.0835958		0	0	0.234721	0	0	0.0942049
Q8WXA9	1	1	Splicing regulatory glutamine/lysine-rich protein 1 OS=Homo sapiens GN=SREK1 PE=1 SV=1	0.210629	0.259038	0.482279	0.120753	0.296297	0.219756		0.33308	0.287855	0.148606	0.12446	0.413725	0.251108		0.299329	0	2.46474	0.247516	1.21549	0.846085
Q96LB3	1	1	Intraflagellar transport protein 74 homolog OS=Homo sapiens GN=IFT74 PE=1 SV=1	0.0407172	0.0336644	0.0801562	0.0744984	0.100009	0.0203904		0.207976	0	0.0736193	0.111686	0.184783	0.161168		1.64869	0	0.480825	0.615811	1.35454	1.16553
Q9BRK5	1	1	45 kDa calcium-binding protein OS=Homo sapiens GN=SDF4 PE=1 SV=1	4.06058	5.0883	3.4161	3.95752	4.22215	4.16984		13.3355	14.1531	14.4588	14.2131	16.068	12.5571		0	0.367908	1.89223	0.996339	1.47485	0.171275
Q9H2S5	1	1	RING finger protein 39 OS=Homo sapiens GN=RNF39 PE=2 SV=2	0.0470962	0.110698	0	0.616116	0.521526	0.668199		0.993294	0.988376	1.23296	0.0377375	0.0820369	0.0458143		52.9201	0	53.3077	57.8127	57.4459	55.4464
Q9UJD0	1	1	Regulating synaptic membrane exocytosis protein 3 OS=Homo sapiens GN=RIMS3 PE=1 SV=1	1.34465	1.07265	1.10658	1.81523	1.29434	1.70231		0.823539	0.754191	0.933173	0.0937753	0	0.0559189		0	0	0	0	0	0
Q9UPU9	1	1	Protein Smaug homolog 1 OS=Homo sapiens GN=SAMD4A PE=1 SV=3	9.64043	5.06601	8.75174	10.8401	5.68062	7.1747		4.09433	3.37075	3.64976	0.533183	0.570183	0.559977		0	0	0	0	0	0
Q9Y4I5	1	1	Tesmin OS=Homo sapiens GN=TESMIN PE=1 SV=2	2.89138	3.40377	3.263	1.65347	1.52839	1.60716		3.69586	3.5469	3.9863	4.10869	3.81072	4.28802		6.12706	0	13.4485	5.11073	5.50866	5.73333
Unique peptide = 1
P02042	5	1	Hemoglobin subunit delta OS=Homo sapiens GN=HBD PE=1 SV=2	1.69914	1.83774	2.01798	2.45685	1.81747	2.2922		0.0221606	0.0902671	0.0728007	0.0217787	0.0477316	0.0206348		0.00542029	0.216166	0.017382	0.0682919	0	0.324392
P62736	5	1	Actin_ aortic smooth muscle OS=Homo sapiens GN=ACTA2 PE=1 SV=1	0.605683	0.244219	0.417252	0.489022	0.289067	0.242129		0.467292	0.291032	0.444788	0.851338	0.118524	0.0841569		0	0	0	0.253691	0.139975	1.06028
Q5VZ66	4	1	Janus kinase and microtubule-interacting protein 3 OS=Homo sapiens GN=JAKMIP3 PE=2 SV=2	16.6661	16.7869	18.4582	10.4375	9.60782	9.41571		23.5875	23.3999	24.9523	28.0862	28.8318	31.6142		61.5918	43.5688	68.5223	45.2983	46.5836	45.0885
P07360	3	1	Complement component C8 gamma chain OS=Homo sapiens GN=C8G PE=1 SV=3	6.14386	8.0766	9.53455	7.39451	5.91521	5.62909		1.44365	1.38957	1.25592	0.105367	0.147186	0.376529		0.385218	0	0	0.0910451	0	0
P21917	2	1	D(4) dopamine receptor OS=Homo sapiens GN=DRD4 PE=1 SV=2	0	0	0	0	0.0289507	0		0	0	0	0	0	0		0	0	0	0	0	0
P28039	2	1	Acyloxyacyl hydrolase OS=Homo sapiens GN=AOAH PE=1 SV=1	3.74025	3.11149	4.79116	4.20266	3.96386	3.91016		0	0	0	0	0	0		0	0	0	0	0	0
P36980	2	1	Complement factor H-related protein 2 OS=Homo sapiens GN=CFHR2 PE=1 SV=1	0.822238	0.795668	0.9075	0.79772	0.783609	0.73826		0.000247411	0	0.000138985	0.000296165	1.34917e-05	7.59178e-05		0	0	0	0	0	0
Q68DU8	2	1	BTB/POZ domain-containing protein KCTD16 OS=Homo sapiens GN=KCTD16 PE=1 SV=1	14.9811	3.41036	13.0756	21.7884	9.41945	12.322		0	0	0	0	0	0		0	0	0	0	0	0
Q8N3L3	2	1	Beta-taxilin OS=Homo sapiens GN=TXLNB PE=1 SV=3	6.7691	5.76561	7.60547	6.68258	5.74374	5.62327		10.9781	10.3303	10.5719	47.2165	43.8842	46.2253		0.909695	0	0.762047	0.965138	1.35578	1.57186
Q8N8U9	2	1	BMP-binding endothelial regulator protein OS=Homo sapiens GN=BMPER PE=1 SV=3	3.26221	3.43438	3.36452	1.90474	3.07413	3.05287		2.9923	3.0533	3.07598	3.48625	3.53771	3.79534		6.50333	1.31177	6.10598	6.68716	6.43308	6.58409
Q92781	2	1	11-cis retinol dehydrogenase OS=Homo sapiens GN=RDH5 PE=1 SV=1	3.85852	1.97863	3.12222	1.81331	2.15091	3.33714		14.7615	10.6452	13.6376	28.5588	11.7284	13.9654		0.281951	0	0.709725	2.87684	2.50385	2.91663
Q96MU6	2	1	Zinc finger protein 778 OS=Homo sapiens GN=ZNF778 PE=1 SV=3	2.1313	1.16067	1.77806	0.495938	0.400248	0.140702		3.36531	2.56904	2.47701	4.91421	3.82531	3.485		9.54941	0	10.0284	10.9851	10.1055	9.86078
Q9NPJ6	2	1	Mediator of RNA polymerase II transcription subunit 4 OS=Homo sapiens GN=MED4 PE=1 SV=1	0.402701	0.392923	0.134114	0.224637	0.381615	0.220703		0.680866	0.607944	0.653639	0.756694	1.00319	0.562322		1.30945	2.7829	1.0857	1.44803	1.4777	1.37502

## Sheet: convert to %
			1) Remove trypsin, peptide number=1, unique peptide=1
			2) Average triplicate mrst
			Amount (fmol)																											NOT used in average
			SDS-PS-COOH													CTMA Cl-PS-NH2													Lutensol-PS-NH2																amount (fmol)	SDS-PS_COOH		CTMA Cl-PS_NH2
Accession	Mass	Description (90 proteins)	no_hep_a	no_hep_b	no_hep_c	no_hep avg	sd	% std	1 IU/mL_a	1 IU/mL_b	1 IU/mL_c	1 IU/mL avg	sd	% std		no_hep_a	no_hep_b	no_hep_c	no_hep avg	sd	% std	1 IU/mL_a	1 IU/mL_b	1 IU/mL_c	1 IU/mL avg	sd	% std		no_hep_a	no_hep_b	no_hep_c	no_hep avg	sd	% std	1 IU/mL_a	1 IU/mL_b	1 IU/mL_c	1 IU/mL avg	sd	% std			Accession	Mass	Description (90 proteins)	no_hep avg	1 IU/mL avg	no_hep avg	1 IU/mL avg
P04114	516974	Apolipoprotein B-100 OS	24.7286	21.5629	25.5743	23.9553	1.72655	7.20739	18.3965	13.9944	15.3437	15.9115	1.84143	11.5729		83.4257	83.9038	89.4993	85.6096	2.75737	3.22086	98.0382	94.8541	100.081	97.6578	2.15086	2.20244		64.0514	8.21755	58.0459	61.0487	3.00273	4.91859	44.2477	54.0715	51.1903	49.8365	4.12321	8.27348			P04114	516974	Apolipoprotein B-100 OS	23.9553	15.9115	85.6096	97.6578
P01024	188688	Complement C3 OS	303.388	320.122	356.747	326.752	22.2828	6.81948	258.703	239.19	236.588	244.827	9.86935	4.03115		36.761	39.1107	39.359	38.4102	1.17054	3.04748	23.0196	24.7396	18.5458	22.1017	2.61056	11.8116		137.544	12.5339	264.852	201.198	63.6538	31.6374	163.588	87.7612	75.0235	81.3923	6.36881	7.82483			P01024	188688	Complement C3 OS	326.752	244.827	38.4102	22.1017
P02768	71362.7	Serum albumin OS	123.129	111.061	138.163	124.118	11.0866	8.93235	114.039	84.0382	83.321	93.7993	14.3145	15.2607		1470.55	1454.42	1576.83	1500.6	54.3014	3.61865	1837.36	1775.65	1944.18	1852.4	69.6178	3.75826		107.96	4.26805	81.9989	94.9793	12.9804	13.6665	84.3698	109.932	107.699	100.667	11.5599	11.4833			P02768	71362.7	Serum albumin OS	124.118	93.7993	1500.6	1852.4
P08603	143773	Complement factor H OS	221.21	202.984	254.746	226.313	21.4377	9.47257	206.893	163.312	162.952	177.719	20.6296	11.608		6.47078	6.43069	6.75107	6.55085	0.142524	2.17566	7.16258	7.14845	7.59779	7.30294	0.208569	2.85596		15.6655	2.12849	16.282	15.9737	0.308269	1.92985	12.8145	13.2097	12.6769	12.9004	0.225825	1.75053			P08603	143773	Complement factor H OS	226.313	177.719	6.55085	7.30294
P06727	45399.1	Apolipoprotein A-IV OS	68.0733	58.8828	72.5808	66.5123	5.70008	8.56997	50.6025	35.4853	37.3531	41.147	6.7294	16.3545		81.3542	81.7632	89.0968	84.0714	3.55741	4.23142	102.34	99.5892	111.676	104.535	5.17265	4.94825		29.3857	11.6604	31.3212	30.3535	0.967735	3.18822	39.2588	40.479	39.9172	39.885	0.498661	1.25025			P06727	45399.1	Apolipoprotein A-IV OS	66.5123	41.147	84.0714	104.535
Q14624	103586	Inter-alpha-trypsin inhibitor heavy chain H4 OS	97.4173	95.0829	110.823	101.108	6.93555	6.85956	92.8325	74.1499	72.1984	79.7269	9.30123	11.6664		15.8116	16.1524	15.5975	15.8538	0.228499	1.44129	11.5168	12.217	12.6497	12.1278	0.466801	3.849		10.0236	4.19993	10.361	10.1923	0.168728	1.65545	9.33351	9.77618	9.29221	9.4673	0.219062	2.31388			Q14624	103586	Inter-alpha-trypsin inhibitor heavy chain H4 OS	101.108	79.7269	15.8538	12.1278
P00734	71519.7	Prothrombin OS	78.6422	79.2555	89.0894	82.329	4.78684	5.81429	77.4166	60.9349	61.1346	66.4954	7.72293	11.6142		89.067	88.0002	91.2602	89.4424	1.35714	1.51733	105.938	102.701	107.591	105.41	2.031	1.92676		8.99903	9.1538	9.86892	9.43397	0.434945	4.61041	5.59107	6.60366	6.75508	6.3166	0.516742	8.18069			P00734	71519.7	Prothrombin OS	82.329	66.4954	89.4424	105.41
P02751	266218	Fibronectin OS	31.6275	30.9378	35.9958	32.8537	2.23956	6.81677	29.5629	24.3296	25.5305	26.4743	2.23829	8.45457		5.16719	4.78159	5.49066	5.14648	0.289845	5.63191	2.37391	2.50777	2.54333	2.475	0.0729428	2.94718		7.75388	0.89505	6.3957	7.07479	0.679092	9.59875	7.97053	7.21533	7.31876	7.50154	0.334305	4.45648			P02751	266218	Fibronectin OS	32.8537	26.4743	5.14648	2.475
P02649	36268.2	Apolipoprotein E OS	25.0042	24.0561	28.5462	25.8689	1.93237	7.46986	21.5757	19.5016	19.0106	20.0293	1.11167	5.5502		35.3104	32.7491	32.8625	33.6407	1.18158	3.51236	57.5171	60.4388	74.5393	64.1651	7.43205	11.5827		56.077	0	55.461	55.769	0.308015	0.552306	40.1482	44.8157	53.8176	46.2605	5.67327	12.2638			P02649	36268.2	Apolipoprotein E OS	25.8689	20.0293	33.6407	64.1651
P01008	53058.8	Antithrombin-III OS	32.968	28.561	37.0964	32.8751	3.48519	10.6013	22.4225	17.264	18.8689	18.0665	0.802423	4.44151		41.2224	42.7491	44.9475	42.973	1.52901	3.55808	54.6409	53.4943	60.1044	56.0799	2.88403	5.14272		13.9537	20.5899	13.2259	13.5898	0.36387	2.67753	11.6167	14.7747	14.8504	13.7473	1.50686	10.9612			P01008	53058.8	Antithrombin-III OS	32.8751	18.0665	42.973	56.0799
P10909	53065	Clusterin OS	197.841	176.651	217.194	197.229	16.5574	8.39505	196.458	153.625	154.897	154.261	0.635961	0.412264		319.319	325.33	337.548	327.399	7.5846	2.31662	188.815	181.919	199.086	189.94	7.05328	3.71342		4115.29	2.87649	3898.03	4006.66	108.632	2.71128	3141.7	3558.88	3427.78	3376.12	174.186	5.15934			P10909	53065	Clusterin OS	197.229	154.261	327.399	189.94
P02647	30777.9	Apolipoprotein A-I OS	118.505	108.328	139.717	122.183	13.0757	10.7017	104.095	82.2553	87.4537	84.8545	2.59918	3.0631		210.236	206.371	220.916	212.507	6.15128	2.89462	261.244	258.386	281.692	267.107	10.3789	3.88565		294.465	12.9018	275.821	285.143	9.32218	3.2693	327.986	375.411	357.936	353.778	19.5833	5.53548			P02647	30777.9	Apolipoprotein A-I OS	122.183	84.8545	212.507	267.107
P00747	93306.4	Plasminogen OS	16.2138	14.8128	19.0949	16.7072	1.78263	10.6698	13.4334	9.9881	13.1339	11.561	1.5729	13.6053		16.9509	16.8044	18.1781	17.3111	0.615967	3.55821	17.5628	17.3537	18.4977	17.8047	0.497367	2.79346		33.2601	3.55241	34.1008	33.6805	0.42035	1.24805	25.1589	31.3242	30.6956	29.0596	2.77011	9.53251			P00747	93306.4	Plasminogen OS	16.7072	11.561	17.3111	17.8047
P01031	190016	Complement C5 OS	43.9887	42.8292	53.1775	46.6651	4.62924	9.92013	40.3386	32.0682	33.344	32.7061	0.637908	1.95043		2.84178	2.7642	2.82041	2.8088	0.0327201	1.16492	2.05475	2.38965	2.66023	2.36821	0.247648	10.4572		4.5726	9.51779	0.779246	2.67592	1.89668	70.8793	4.02601	1.05505	1.04377	1.04941	0.00564092	0.537533			P01031	190016	Complement C5 OS	46.6651	32.7061	2.8088	2.36821
P01042	73041	Kininogen-1 OS	117.884	116.251	131.984	122.04	7.06336	5.78776	119.173	90.1237	90.78	90.4519	0.328127	0.362764		19.2881	21.6449	22.0298	20.9876	1.21195	5.77462	20.1024	21.6941	23.2514	21.6826	1.2856	5.92917		12.4214	2.38089	11.5702	11.9958	0.425585	3.54777	9.96721	13.0768	12.9611	12.0017	1.43937	11.9931			P01042	73041	Kininogen-1 OS	122.04	90.4519	20.9876	21.6826
P04003	69086.2	C4b-binding protein alpha chain OS	55.7239	48.2421	62.1924	55.3862	5.70021	10.2918	43.9435	28.8037	30.8285	29.8161	1.01238	3.39542		135.576	136.204	145.209	138.996	4.40038	3.16583	57.3123	57.6872	62.1114	59.037	2.1793	3.69142		6.27957	14.0587	5.9181	6.09883	0.180736	2.96345	5.46287	6.54555	6.31795	6.10879	0.46609	7.62983			P04003	69086.2	C4b-binding protein alpha chain OS	55.3862	29.8161	138.996	59.037
P03952	73479.8	Plasma kallikrein OS	12.3712	11.1612	13.6728	12.4017	1.02558	8.26964	11.4653	8.54441	9.39176	8.96809	0.423679	4.7243		8.53317	8.60989	9.08446	8.74251	0.243817	2.78887	7.90022	6.12052	6.97462	6.99845	0.726754	10.3845		26.8694	0.912763	24.8274	25.8484	1.02099	3.94993	21.5687	19.6417	20.2164	20.4756	0.807764	3.94501			P03952	73479.8	Plasma kallikrein OS	12.4017	8.96809	8.74251	6.99845
P01871	49991	Ig mu chain C region OS	43.9759	40.5092	48.1083	44.1978	3.10628	7.02813	40.8907	29.0106	30.3567	29.6837	0.673097	2.26757		52.0189	49.0645	52.5626	51.2153	1.53699	3.00103	46.1455	45.0493	46.9522	46.049	0.779833	1.69349		12.4656	6.56257	10.194	11.3298	1.13578	10.0248	11.0223	12.7076	12.2868	12.0056	0.71619	5.96548			P01871	49991	Ig mu chain C region OS	44.1978	29.6837	51.2153	46.049
P04004	55104	Vitronectin OS	160.481	166.536	184.56	170.525	10.227	5.99737	161.132	140.473	143.681	148.429	9.07756	6.11577		245.06	251.486	265.889	254.145	8.70888	3.42674	184.944	178.697	190.905	184.849	4.98446	2.69651		40.469	4.44838	47.0916	43.7803	3.3113	7.56345	32.0248	32.8755	30.8138	31.9047	0.845962	2.65152			P04004	55104	Vitronectin OS	170.525	148.429	254.145	184.849
P02774	54560.5	Vitamin D-binding protein OS	16.9847	13.6845	19.5676	15.3346	1.65009	10.7606	14.8067	12.4969	15.6871	14.3302	1.34528	9.3877		41.852	51.0907	52.4357	48.4595	4.70431	9.70772	45.5697	52.6213	55.819	51.3367	4.28176	8.34054		10.7193	8.38627	8.30377	9.51152	1.20775	12.6978	8.30576	9.55071	9.11532	8.9906	0.515844	5.7376			P02774	54560.5	Vitamin D-binding protein OS	15.3346	14.3302	48.4595	51.3367
P06396	86096.8	Gelsolin OS	64.1554	66.9682	76.6042	69.2426	5.33059	7.69843	72.3144	59.7265	61.7276	64.5895	5.52312	8.55112		14.9043	15.5284	15.5418	15.3248	0.297385	1.94055	11.7887	12.1922	11.5043	11.8284	0.282238	2.3861		14.0432	3.801	12.8293	13.4363	0.606947	4.51722	11.5717	12.6413	11.9567	12.0566	0.442363	3.66906			P06396	86096.8	Gelsolin OS	69.2426	64.5895	15.3248	11.8284
P09871	78224.3	Complement C1s subcomponent OS	22.9364	25.2356	28.2243	25.4654	2.16489	8.50128	24.3052	19.9982	20.5	21.6012	1.923	8.90229		13.5527	13.6536	13.6212	13.6092	0.0420379	0.308894	6.68313	6.96417	7.46432	7.03721	0.323073	4.59092		2.82717	7.2242	2.26258	2.54487	0.282296	11.0927	2.36528	4.3027	4.34783	4.32526	0.0225637	0.521673			P09871	78224.3	Complement C1s subcomponent OS	25.4654	21.6012	13.6092	7.03721
P13671	108436	Complement component C6 OS	13.9767	13.2517	13.7899	13.6728	0.307355	2.24793	12.1674	10.9054	10.9928	11.3552	0.575426	5.06751		5.0047	5.32041	4.85005	5.05839	0.195741	3.86963	2.32462	2.96035	2.81942	2.70146	0.272609	10.0912		2.80926	7.79598	2.84127	2.82527	0.0160034	0.566437	2.43193	2.80046	2.46276	2.56505	0.166935	6.50808			P13671	108436	Complement component C6 OS	13.6728	11.3552	5.05839	2.70146
P00736	81658.4	Complement C1r subcomponent OS	22.9936	19.2162	23.074	21.7613	1.79994	8.27127	21.2191	15.6992	17.2614	18.0599	2.32312	12.8634		9.23495	8.68191	8.84213	8.91966	0.232338	2.60479	3.75848	4.55468	5.81614	4.70977	0.847164	17.9874		1.38544	1.44343	1.54468	1.46506	0.0796213	5.43469	2.62192	2.35364	2.66132	2.54562	0.136705	5.3702			P00736	81658.4	Complement C1r subcomponent OS	21.7613	18.0599	8.91966	4.70977
P02749	39609.8	Beta-2-glycoprotein 1 OS	294.473	251.086	321.994	289.184	29.1884	10.0934	304.398	217.326	233.318	251.681	37.8442	15.0366		14.8485	12.4059	14.8782	14.0442	1.15853	8.24915	22.5809	18.4149	23.8387	21.6115	2.31794	10.7255		2.67031	10.9715	2.87486	2.77259	0.102275	3.68879	3.40972	4.40901	3.61036	3.8097	0.431622	11.3296			P02749	39609.8	Beta-2-glycoprotein 1 OS	289.184	251.681	14.0442	21.6115
P07996	133375	Thrombospondin-1 OS	5.91452	6.09913	5.5161	5.84325	0.243299	4.16377	5.72201	4.5789	4.55707	4.95266	0.544086	10.9857		9.05508	9.54719	9.38786	9.33005	0.205021	2.19742	4.74041	5.32971	4.13738	4.73583	0.486779	10.2786		0	0.118548	0.581266	0.0592739	0.0592739	100	0.0659907	0.102244	0.132568	0.100268	0.0272161	27.1434			P07996	133375	Thrombospondin-1 OS	5.84325	4.95266	9.33005	4.73583
P01009	46907.7	Alpha-1-antitrypsin OS	28.6759	30.9446	32.5047	30.7084	1.57203	5.11923	30.277	25.1032	23.7417	26.374	2.81524	10.6743		23.6614	24.6168	25.6878	24.6553	0.827748	3.35728	13.0588	13.6041	13.9854	13.5494	0.380264	2.8065		78.6196	9.51972	62.0075	70.3135	8.30605	11.8129	73.6926	97.0913	92.4416	87.7418	10.114	11.527			P01009	46907.7	Alpha-1-antitrypsin OS	30.7084	26.374	24.6553	13.5494
P19823	106920	Inter-alpha-trypsin inhibitor heavy chain H2 OS	19.385	15.2904	19.7278	18.1344	2.01587	11.1163	18.0106	13.7303	14.9918	15.5776	1.79583	11.5283		27.6075	24.4984	27.8445	26.6501	1.52456	5.72065	27.8728	25.2694	27.0423	26.7282	1.08579	4.06236		3.17861	3.93635	3.97658	3.57759	0.398986	11.1523	7.14772	5.83664	6.40023	6.46153	0.537	8.31072			P19823	106920	Inter-alpha-trypsin inhibitor heavy chain H2 OS	18.1344	15.5776	26.6501	26.7282
P00751	86901.6	Complement factor B OS	32.7021	30.9035	38.5681	34.0579	3.27264	9.60906	28.1998	24.7916	25.2401	26.0772	1.51203	5.79831		3.3547	2.62911	3.15716	3.04699	0.306295	10.0524	1.68464	1.85671	1.90435	1.81523	0.0943714	5.19885		3.08453	0.860609	3.39167	3.2381	0.153566	4.74248	2.92687	1.86349	1.64981	1.75665	0.106839	6.08195			P00751	86901.6	Complement factor B OS	34.0579	26.0772	3.04699	1.81523
P02748	64656.2	Complement component C9 OS	11.7324	11.0729	12.3817	11.729	0.53433	4.55564	10.6578	9.46312	9.84093	9.98728	0.498577	4.99212		26.4261	23.7648	26.2061	25.4657	1.20606	4.73603	24.5181	20.6614	19.5927	21.5908	2.11545	9.79794		1.86433	12.4778	1.72144	1.79289	0.0714483	3.9851	4.8723	3.09432	3.17292	3.13362	0.0393008	1.25417			P02748	64656.2	Complement component C9 OS	11.729	9.98728	25.4657	21.5908
P03951	72162.2	Coagulation factor XI OS	2.52855	3.78531	2.15882	2.82422	0.696148	24.6492	2.36775	2.01776	2.97677	2.45409	0.396246	16.1464		0.879205	1.09373	1.01851	0.997148	0.0888713	8.91255	0.947704	1.02362	0.997398	0.989575	0.0314834	3.18151		0.149262	12.2996	0.278741	0.214001	0.0647396	30.252	0.166355	0.495213	0.50289	0.499052	0.00383871	0.769202			P03951	72162.2	Coagulation factor XI OS	2.82422	2.45409	0.997148	0.989575
P35858	66776.4	Insulin-like growth factor-binding protein complex acid labile subunit OS	9.79812	7.10762	9.47901	8.79492	1.20019	13.6464	8.01009	6.38163	6.63622	7.00931	0.715249	10.2043		10.0645	8.86521	9.7225	9.55073	0.504441	5.2817	10.8736	9.7019	10.1534	10.243	0.482534	4.71087		19.3867	8.09323	19.6368	19.5117	0.125061	0.640954	18.2201	18.8232	19.3717	18.805	0.4703	2.50093			P35858	66776.4	Insulin-like growth factor-binding protein complex acid labile subunit OS	8.79492	7.00931	9.55073	10.243
P07225	77175.7	Vitamin K-dependent protein S OS	14.8187	9.87134	12.8572	12.5158	2.03413	16.2526	9.74196	7.07341	7.3876	8.06766	1.19084	14.7607		9.13061	10.2071	10.307	9.88157	0.53257	5.38953	3.6249	3.44336	4.17205	3.74677	0.309715	8.26619		0.673495	0.577832	0.722322	0.697909	0.0244131	3.49803	0.668224	0.822769	0.605227	0.69874	0.0913947	13.0799			P07225	77175.7	Vitamin K-dependent protein S OS	12.5158	8.06766	9.88157	3.74677
P04196	60547.8	Histidine-rich glycoprotein OS	19.2799	23.2267	24.2472	22.2513	2.14196	9.62625	30.3644	29.8469	29.4537	29.8883	0.372917	1.2477		0.128664	0.0916515	0.0447561	0.110158	0.0185061	16.7997	0.0414592	0.0672194	0.204986	0.0543393	0.0128801	23.7031		0.0328619	6.90394	0.0382962	0.0355791	0.00271713	7.63687	0	0	0	0	0				P04196	60547.8	Histidine-rich glycoprotein OS	22.2513	29.8883	0.110158	0.0543393
P05155	55382.4	Plasma protease C1 inhibitor OS	33.8569	25.9524	32.4705	30.76	3.44622	11.2036	28.9259	21.3493	22.1095	21.7294	0.380074	1.74912		30.7293	29.9004	33.0211	31.2169	1.31985	4.228	25	23.0805	25.6031	24.5612	1.07556	4.3791		33.2126	0.414402	32.3309	32.7717	0.440877	1.3453	33.9511	31.2884	31.6162	32.2852	1.18553	3.67206			P05155	55382.4	Plasma protease C1 inhibitor OS	30.76	21.7294	31.2169	24.5612
P10643	96711.9	Complement component C7 OS	21.8322	19.785	22.4416	21.3529	1.13627	5.3214	15.919	11.3627	12.5851	11.9739	0.611206	5.10449		15.6395	15.8403	16.8635	16.1144	0.535975	3.32606	17.6869	17.4684	19.4301	18.1951	0.87779	4.82432		8.50065	3.05469	6.53728	7.51896	0.981686	13.0561	9.87862	10.4837	10.7155	10.3593	0.352807	3.40571			P10643	96711.9	Complement component C7 OS	21.3529	11.9739	16.1144	18.1951
P01876	38510.1	Ig alpha-1 chain C region OS	23.6257	20.6146	25.7428	23.3277	2.10415	9.01996	24.4215	18.3859	19.0541	18.72	0.334072	1.78457		15.0286	15.9738	15.8176	15.6066	0.413689	2.65072	7.01272	7.1215	7.03879	7.05767	0.0463748	0.657084		2.67193	0.656327	4.06048	3.3662	0.694274	20.6248	2.84172	3.67531	3.97265	3.49656	0.478689	13.6903			P01876	38510.1	Ig alpha-1 chain C region OS	23.3277	18.72	15.6066	7.05767
P51884	38771.2	Lumican OS	4.31664	5.17791	4.19998	4.56484	0.436112	9.5537	4.31725	4.05075	3.70885	4.02562	0.249013	6.18571		19.8247	19.9322	20.7366	20.1645	0.406908	2.01794	19.1009	19.3834	18.9885	19.1576	0.166133	0.867191		3.63763	2.15428	3.09423	3.36593	0.271697	8.07197	3.81194	5.0751	4.71129	4.53278	0.530908	11.7126			P51884	38771.2	Lumican OS	4.56484	4.02562	20.1645	19.1576
P18428	53554.8	Lipopolysaccharide-binding protein OS	5.02761	5.54277	5.56311	5.37783	0.247783	4.6075	8.49077	5.76133	5.13591	5.44862	0.312708	5.73921		0.434453	0.469917	0.281043	0.452185	0.0177323	3.92146	0.475243	0.597062	0.572103	0.548136	0.0525406	9.58532		0.376207	18.3549	0.690627	0.533417	0.15721	29.4722	1.16724	0.827904	0.966912	0.987353	0.139287	14.1071			P18428	53554.8	Lipopolysaccharide-binding protein OS	5.37783	5.44862	0.452185	0.548136
P01834	11779.9	Ig kappa chain C region OS	84.5706	92.6738	98.9824	92.0756	5.89877	6.40645	83.5628	73.4445	74.9675	77.3249	4.45445	5.76069		37.2231	38.1526	39.0067	38.1274	0.728361	1.91033	16.3276	18.1796	18.0363	17.5145	0.841283	4.80335		5.78444	2.56556	9.09845	7.44144	1.657	22.2672	7.05146	8.10094	7.7779	7.64343	0.438873	5.74183			P01834	11779.9	Ig kappa chain C region OS	92.0756	77.3249	38.1274	17.5145
P02766	16001.1	Transthyretin OS	7.50322	7.85607	8.47831	7.94587	0.403109	5.07319	7.46295	7.35805	7.60113	7.47404	0.0995441	1.33186		10.0085	10.3554	10.6468	10.3369	0.260945	2.5244	4.47347	4.37355	4.79916	4.54872	0.181719	3.99495		1.82982	0.063755	1.26709	1.54845	0.281367	18.1708	1.33965	1.55635	1.56165	1.48588	0.103422	6.96033			P02766	16001.1	Transthyretin OS	7.94587	7.47404	10.3369	4.54872
P05154	45788.8	Plasma serine protease inhibitor OS	6.22436	8.15196	7.02918	7.13517	0.790498	11.0789	7.35111	7.32159	7.31497	7.32922	0.01571	0.214348		2.11326	1.90626	1.81966	1.94639	0.123173	6.3283	1.77432	1.90538	1.99001	1.8899	0.0887351	4.69522		3.2619	4.23386	4.78435	4.02312	0.761226	18.9213	4.15408	2.31359	2.39888	2.35624	0.0426462	1.80993			P05154	45788.8	Plasma serine protease inhibitor OS	7.13517	7.32922	1.94639	1.8899
P05546	57241.8	Heparin cofactor 2 OS	8.05073	9.46031	8.62631	8.71245	0.57867	6.64187	8.67097	8.87381	9.03083	8.85853	0.147311	1.66292		16.94	21.155	20.4337	19.5096	1.84069	9.4348	18.1274	19.3863	17.2864	18.2667	0.862895	4.72386		96.1299	1.50926	228.407	162.268	66.1383	40.7586	83.297	52.1544	49.7459	61.7324	15.2801	24.7522			P05546	57241.8	Heparin cofactor 2 OS	8.71245	8.85853	19.5096	18.2667
P0CG05	11464.7	Ig lambda-2 chain C regions OS	17.0838	20.9775	34.1289	19.0307	1.94683	10.2299	12.0043	23.2761	22.959	23.1176	0.158545	0.68582		46.2046	24.667	27.9922	26.3296	1.66263	6.3147	28.3036	21.8495	26.9707	25.7079	2.78208	10.8219		2.80297	0	6.54096	4.67196	1.86899	40.0045	7.31201	5.88331	7.00618	6.73384	0.614233	9.1216			P0CG05	11464.7	Ig lambda-2 chain C regions OS	19.0307	23.1176	26.3296	25.7079
P55058	54967.7	Phospholipid transfer protein OS	7.85235	7.25595	8.40594	7.83808	0.469592	5.99116	6.34876	5.82635	6.24943	6.14151	0.226515	3.68826		8.06634	7.77501	7.80298	7.88144	0.13124	1.66517	8.62014	8.7996	8.6495	8.68975	0.0785994	0.904507		16.5756	2.35445	12.9595	14.7675	1.80806	12.2435	13.0601	13.8411	13.5513	13.4841	0.322353	2.39061			P55058	54967.7	Phospholipid transfer protein OS	7.83808	6.14151	7.88144	8.68975
P00739	39542.9	Haptoglobin-related protein OS	5.78124	4.80028	5.60346	5.39499	0.42674	7.90993	8.45095	5.91124	5.61775	6.65998	1.27206	19.1001		6.754	6.29268	6.80796	6.61821	0.231239	3.49398	5.98619	4.03641	4.44734	4.82331	0.839217	17.3992		3.98555	36.7573	3.55682	3.77118	0.214363	5.68424	5.36955	4.83018	4.89723	5.03232	0.240026	4.76969			P00739	39542.9	Haptoglobin-related protein OS	5.39499	6.65998	6.61821	4.82331
P02743	25501.2	Serum amyloid P-component OS	16.6514	12.5291	16.6719	16.6617	0.0102394	0.0614549	14.7592	11.1634	11.5906	12.5044	1.60389	12.8266		0.65888	0.513943	0.646655	0.606493	0.0656325	10.8217	0.699724	0.784729	0.764963	0.749805	0.0363203	4.84397		0	0.227744	0.716322	0.358161	0.358161	100	0.144215	0.234253	0.093959	0.157476	0.0580373	36.8547			P02743	25501.2	Serum amyloid P-component OS	16.6617	12.5044	0.606493	0.749805
P02760	39912	Protein AMBP OS	21.1945	17.3915	24.2868	20.9576	2.81998	13.4557	10.1141	7.59371	8.40482	8.70422	1.05051	12.0689		4.47223	4.75669	4.80074	4.67655	0.145594	3.11328	4.24631	4.27463	4.52489	4.34861	0.125183	2.8787		9.69878	0	6.87586	8.28732	1.41146	17.0316	6.51215	7.82501	7.94035	7.42584	0.647786	8.72341			P02760	39912	Protein AMBP OS	20.9576	8.70422	4.67655	4.34861
P19827	101846	Inter-alpha-trypsin inhibitor heavy chain H1 OS	14.5643	11.1289	14.6525	14.6084	0.0440693	0.301671	12.6283	11.1175	12.0529	11.9329	0.622606	5.21756		4.39045	4.28156	4.02755	4.23319	0.152052	3.5919	2.22902	2.11894	2.44679	2.26492	0.136229	6.01473		0.481221	0.282527	0.4827	0.48196	0.000739219	0.153378	0.474369	0.210221	0.131067	0.271886	0.146778	53.9853			P19827	101846	Inter-alpha-trypsin inhibitor heavy chain H1 OS	14.6084	11.9329	4.23319	2.26492
P00738	45889.7	Haptoglobin OS	13.1778	12.0094	13.5709	12.9194	0.663182	5.13323	16.6309	13.1038	12.5559	14.0969	1.80571	12.8093		15.5767	16.0784	16.8957	16.1836	0.543625	3.35911	11.7911	12.1531	12.8936	12.2793	0.458827	3.7366		4.10392	115.742	4.46823	4.28608	0.182157	4.24997	4.69162	5.63457	5.89694	5.40771	0.517559	9.57076			P00738	45889.7	Haptoglobin OS	12.9194	14.0969	16.1836	12.2793
P00740	53147.1	Coagulation factor IX OS	4.02999	3.40241	4.09344	3.84195	0.311875	8.11762	4.02572	3.1265	3.20677	3.453	0.406301	11.7666		1.39291	1.54521	1.47178	1.46996	0.0621897	4.23069	0.953427	0.827288	0.860558	0.880425	0.053378	6.06275		0.0370616	1.39455	0.44634	0.241701	0.204639	84.6664	0.114535	0.320776	0.196255	0.210522	0.0847996	40.2807			P00740	53147.1	Coagulation factor IX OS	3.84195	3.453	1.46996	0.880425
P01023	164717	Alpha-2-macroglobulin OS	0.838136	0.855289	0.924817	0.872747	0.0374791	4.29438	0.823559	0.708561	0.54918	0.693767	0.112502	16.2161		0.761126	0.702599	0.755944	0.73989	0.0264534	3.57532	0.55938	0.70003	0.621383	0.626931	0.0575539	9.18026		0.676327	8.20756	1.27848	0.977401	0.301075	30.8036	0.828687	0.757975	0.86534	0.817334	0.044561	5.45199			P01023	164717	Alpha-2-macroglobulin OS	0.872747	0.693767	0.73989	0.626931
P49908	42642.8	Selenoprotein P OS	8.46511	8.681	8.49071	8.54561	0.0963072	1.12698	7.23035	5.67855	6.23814	6.38235	0.641674	10.0539		9.19647	9.63311	9.04389	9.29116	0.249693	2.68743	7.78027	7.75368	8.2001	7.91135	0.204465	2.58445		13.6827	1.46879	9.87186	11.7773	1.90541	16.1787	9.06924	11.9821	11.2006	10.7506	1.231	11.4504			P49908	42642.8	Selenoprotein P OS	8.54561	6.38235	9.29116	7.91135
Q14520	64781.8	Hyaluronan-binding protein 2 OS	7.89811	5.06583	6.18496	6.38296	1.16472	18.2473	7.39982	5.57212	5.76228	6.24474	0.820444	13.1382		9.2952	7.96064	9.54696	8.93427	0.69609	7.79124	6.31483	7.61459	8.18645	7.37196	0.783107	10.6228		7.60211	0	6.65015	7.12613	0.47598	6.67936	8.79373	8.86513	8.6799	8.77958	0.0762762	0.868791			Q14520	64781.8	Hyaluronan-binding protein 2 OS	6.38296	6.24474	8.93427	7.37196
P02652	11289.1	Apolipoprotein A-II OS	1.21174	2.18294	1.56645	1.65371	0.401265	24.2645	0.810949	1.84221	1.40879	1.35398	0.42279	31.2256		5.16283	6.42996	4.13572	5.24284	0.938324	17.8973	1.75179	8.28238	12.1673	7.40049	4.2976	58.0718		4.0786	5.15631	4.21374	4.14617	0.0675704	1.6297	4.12371	5.03643	7.90674	5.68896	1.61187	28.3333			P02652	11289.1	Apolipoprotein A-II OS	1.65371	1.35398	5.24284	7.40049
P02746	26949.9	Complement C1q subcomponent subunit B OS	56.9332	51.7901	65.6107	58.1113	5.70343	9.81466	52.0108	39.0361	38.5382	43.1951	6.237	14.4392		2.6548	2.69729	3.06943	2.80717	0.186251	6.63484	4.99861	5.35712	6.169	5.50824	0.489611	8.88871		0.263368	0.412829	0.25082	0.257094	0.00627399	2.44035	0.2503	0.494211	0.424109	0.38954	0.102533	26.3214			P02746	26949.9	Complement C1q subcomponent subunit B OS	58.1113	43.1951	2.80717	5.50824
P01860	42313.5	Ig gamma-3 chain C region OS	14.136	15.4227	16.413	15.3239	0.932209	6.08335	13.8412	12.4898	12.6031	12.978	0.612112	4.71653		5.06706	5.31423	5.6612	5.34749	0.243694	4.55716	5.15794	5.24482	4.30505	4.9026	0.424022	8.64892		5.84417	2.16232	10.9852	8.41466	2.5705	30.5478	4.96462	4.43948	4.81698	4.74036	0.221127	4.66478			P01860	42313.5	Ig gamma-3 chain C region OS	15.3239	12.978	5.34749	4.9026
Q03591	38791.2	Complement factor H-related protein 1 OS	21.1431	17.4403	22.9001	20.4945	2.27567	11.1038	17.1479	11.9582	12.5278	13.8779	2.32386	16.745		38.682	37.7351	41.3869	39.268	1.54738	3.94057	47.7419	44.4512	49.4354	47.2095	2.06933	4.3833		14.4531	4.17398	11.4752	12.9641	1.48896	11.4852	16.8956	21.5419	20.7815	19.7397	2.03489	10.3086			Q03591	38791.2	Complement factor H-related protein 1 OS	20.4945	13.8779	39.268	47.2095
P68871	16112.5	Hemoglobin subunit beta OS	9.40658	8.74733	9.80108	9.31833	0.434692	4.66491	6.64102	6.41664	7.13369	6.73045	0.299486	4.44971		5.54638	5.5566	5.78994	5.63098	0.112485	1.9976	3.60629	4.28674	4.41721	4.10341	0.355535	8.66437		20.7931	0.0803706	14.0437	17.4184	3.37472	19.3744	18.9334	15.5704	23.7714	19.4251	3.36602	17.3282			P68871	16112.5	Hemoglobin subunit beta OS	9.31833	6.73045	5.63098	4.10341
O43866	39627.6	CD5 antigen-like OS	0.592774	0.904283	0.819744	0.772267	0.13153	17.0316	1.82502	1.67258	1.64477	1.71412	0.0792344	4.62245		0.104359	0.0696942	0.0489055	0.0743196	0.0228739	30.7777	0.0709225	0.0155526	0	0.028825	0.030437	105.592		0	0	0.0402759	0	0		0.058909	0	0.0588746	0.0588918	0	0			O43866	39627.6	CD5 antigen-like OS	0.772267	1.71412	0.0743196	0.028825
Q9BXR6	66472.5	Complement factor H-related protein 5 OS	4.39806	3.82484	4.5982	4.2737	0.327742	7.6688	5.38835	4.15058	3.20162	4.24685	0.895318	21.0819		0.427918	0.565057	0.461032	0.484669	0.0584285	12.0554	0.455123	0.385848	0.371464	0.404145	0.0365222	9.0369		0	0.767797	0.295449	0.147725	0.147725	100	0.0539708	0.155812	0.126418	0.112067	0.0427971	38.1889			Q9BXR6	66472.5	Complement factor H-related protein 5 OS	4.2737	4.24685	0.484669	0.404145
O95445	21595.5	Apolipoprotein M OS	1.69992	0.729951	1.47937	1.58964	0.110274	6.93701	1.9535	1.65344	1.29854	1.63516	0.267699	16.3714		0.71154	0.783231	0.817806	0.770859	0.0442561	5.74114	0.751453	0.473267	0.686782	0.637167	0.118864	18.6551		0.942841	0	0.819318	0.881079	0.0617619	7.00979	1.29573	1.32033	1.29115	1.3024	0.0128134	0.983825			O95445	21595.5	Apolipoprotein M OS	1.58964	1.63516	0.770859	0.637167
P07357	66874.1	Complement component C8 alpha chain OS	3.8583	3.96153	5.04415	4.28799	0.536344	12.508	4.20223	3.28372	2.9576	3.48119	0.526953	15.1372		0.14407	0.214345	0.0782995	0.145571	0.0555505	38.1603	0	0	0	0	0			0	0.574395	0.0297037	0.0148518	0.0148518	100	0	0	0	0	0				P07357	66874.1	Complement component C8 alpha chain OS	4.28799	3.48119	0.145571	0
P0C0L5	194291	Complement C4-B OS	17.9467	16.5248	18.5733	17.6816	0.857025	4.84699	16.2157	14.665	14.3908	15.0905	0.803462	5.32429		46.185	45.5722	48.0211	46.5928	1.04052	2.23323	47.4751	45.1104	48.8722	47.1526	1.55258	3.29267		21.603	4.26352	19.3938	20.4984	1.10463	5.38886	18.3614	21.3033	21.2248	20.2965	1.36867	6.74336			P0C0L5	194291	Complement C4-B OS	17.6816	15.0905	46.5928	47.1526
P0C0L4	194383	Complement C4-A OS	9.46955	8.71929	9.80014	9.32966	0.452208	4.84699	8.55617	7.73795	7.59329	7.96247	0.423945	5.32429		24.3694	24.0461	25.3382	24.5846	0.549029	2.23323	25.0502	23.8024	25.7873	24.88	0.819216	3.29267		11.3988	2.24964	10.2331	10.8159	0.582856	5.38886	9.68838	11.2406	11.1992	10.7094	0.722174	6.74336			P0C0L4	194383	Complement C4-A OS	9.32966	7.96247	24.5846	24.88
P60709	42079	Actin_ cytoplasmic 1 OS	0.424144	0.525515	0.356883	0.435514	0.0693116	15.9149	0.34555	0.487694	0.389929	0.407724	0.0593787	14.5634		0.0269786	0.0431552	0.0436271	0.0379203	0.00773936	20.4095	0	0	0.0537292	0	0			1.69127	0.700247	2.84831	2.26979	0.578519	25.4878	2.51178	2.26265	2.9865	2.58698	0.300255	11.6064			P60709	42079	Actin_ cytoplasmic 1 OS	0.435514	0.407724	0.0379203	0
P01857	36619.2	Ig gamma-1 chain C region OS	39.6149	37.1079	43.7737	40.1655	2.74903	6.84426	36.339	28.4162	29.4868	31.414	3.50982	11.1728		23.3664	24.0278	24.9984	24.1309	0.670257	2.77759	31.415	31.3711	34.0785	32.2882	1.26603	3.92104		32.8146	14.5401	25.2763	29.0454	3.76915	12.9767	24.3826	28.5452	27.6357	26.8545	1.78691	6.65406			P01857	36619.2	Ig gamma-1 chain C region OS	40.1655	31.414	24.1309	32.2882
P01859	36528	Ig gamma-2 chain C region OS	5.06931	5.03409	5.55493	5.21944	0.237659	4.55334	5.95885	5.61532	5.56924	5.71447	0.173823	3.04181		1.9083	2.42548	2.0292	2.12099	0.220892	10.4145	1.01692	1.23725	1.04095	1.09837	0.0986876	8.98491		0.973028	0.908319	0.855277	0.914153	0.0588755	6.44044	0.920559	1.39671	1.05018	1.12248	0.201	17.9067			P01859	36528	Ig gamma-2 chain C region OS	5.21944	5.71447	2.12099	1.09837
P00748	70073.2	Coagulation factor XII OS	6.37412	4.58319	6.87973	5.94568	0.985291	16.5715	8.17973	4.90142	5.37424	6.15179	1.4469	23.52		0.0887201	0.0647953	0.1051	0.0862052	0.0165502	19.1986	0	0.037675	0.0507101	0.0441925	0.00651754	14.7481		0.0817559	1.00214	0.137265	0.10951	0.0277544	25.3441	0.199077	0.0715294	0.21974	0.209409	0.0103316	4.93371			P00748	70073.2	Coagulation factor XII OS	5.94568	6.15179	0.0862052	0.0441925
P05090	21560.7	Apolipoprotein D OS	0.721733	0.425266	0.405738	0.415502	0.00976416	2.34997	0.290216	0.510989	0.546568	0.528779	0.0177894	3.36423		0.337872	0.440476	0.341952	0.373433	0.0474356	12.7026	0.387983	0.561851	0.431071	0.460302	0.0739295	16.0611		0.174218	0.0205152	0.24493	0.209574	0.0353563	16.8706	0.443662	0.443349	0.362753	0.416588	0.038067	9.1378			P05090	21560.7	Apolipoprotein D OS	0.415502	0.528779	0.373433	0.460302
O14791	44031.3	Apolipoprotein L1 OS	6.6571	4.95767	5.87659	5.83046	0.694556	11.9126	7.53845	7.34276	5.89555	6.92559	0.732713	10.5798		12.281	9.4922	10.1894	10.6542	1.18499	11.1223	7.58145	6.41946	7.07123	7.02405	0.47555	6.77032		85.6227	0.482076	76.6577	81.1402	4.48252	5.52441	42.0187	44.3774	44.2077	43.5346	1.07415	2.46734			O14791	44031.3	Apolipoprotein L1 OS	5.83046	6.92559	10.6542	7.02405
P02790	52417.8	Hemopexin OS	14.7183	15.4827	16.9611	15.7207	0.93095	5.9218	13.4088	12.1342	12.2158	12.5863	0.58258	4.62869		12.6137	12.2779	12.9841	12.6253	0.288425	2.28451	17.0933	17.2383	19.4226	17.9181	1.06552	5.94661		28.8992	0.920092	23.7882	26.3437	2.55546	9.70047	20.9391	23.6052	23.0252	22.5232	1.14487	5.08309			P02790	52417.8	Hemopexin OS	15.7207	12.5863	12.6253	17.9181
P27918	53785.6	Properdin OS	1.04329	1.05313	0.971417	1.02261	0.036424	3.56185	2.07471	1.73377	1.68252	1.83033	0.174062	9.50983		0.129881	0.236304	0.100266	0.115074	0.0148075	12.8678	0.0397013	0.10992	0.0501365	0.0449189	0.00521758	11.6156		0	0	0.462566	0	0		0.488628	0.311291	0.356348	0.385423	0.0752599	19.5266			P27918	53785.6	Properdin OS	1.02261	1.83033	0.115074	0.0449189
Q14166	75202.1	Tubulin--tyrosine ligase-like protein 12 OS	8.66957	10.371	9.98488	9.67515	0.728314	7.52768	12.2247	11.1444	11.057	11.4754	0.531027	4.62753		8.93168	13.7253	10.9045	11.1871	1.96715	17.584	1.24929	1.56878	1.78498	1.53435	0.220043	14.3411		0.365994	0.35741	0.427464	0.396729	0.0307352	7.74714	0.573808	0.439487	0.520002	0.511099	0.0551967	10.7996			Q14166	75202.1	Tubulin--tyrosine ligase-like protein 12 OS	9.67515	11.4754	11.1871	1.53435
Q9BW19	74318	Kinesin-like protein KIFC1 OS	1.60057	1.58145	1.67647	1.6195	0.0410346	2.53379	1.00066	1.16408	0.92291	1.02922	0.100506	9.76534		2.49603	2.26248	2.57551	2.44467	0.132855	5.43447	2.8927	2.87948	3.14757	2.97325	0.123382	4.14975		1.2443	6.59112	1.08616	1.16523	0.0790735	6.78608	1.42194	2.09278	1.68919	1.73464	0.275748	15.8966			Q9BW19	74318	Kinesin-like protein KIFC1 OS	1.6195	1.02922	2.44467	2.97325
A5A3E0	123099	POTE ankyrin domain family member F OS	4.37386	0.604712	6.14601	5.25993	0.886077	16.8458	12.1168	11.9767	11.4361	11.8432	0.293478	2.47803		3.26844	3.38993	3.31456	3.32431	0.0500775	1.5064	0.751414	0.862528	1.15956	0.924499	0.172289	18.6359		0.692729	0	1.8834	1.28806	0.595336	46.2194	1.93632	2.36695	2.82457	2.37594	0.362682	15.2647			A5A3E0	123099	POTE ankyrin domain family member F OS	5.25993	11.8432	3.32431	0.924499
P00742	56100.4	Coagulation factor X OS	2.51821	1.76267	2.30025	2.19371	0.317513	14.4738	2.40167	1.8503	1.76692	1.80861	0.0416914	2.30516		1.7262	1.64755	1.88795	1.7539	0.100076	5.7059	2.04346	1.71278	1.75685	1.83769	0.146603	7.97755		4.58992	0.492252	4.20614	4.39803	0.19189	4.3631	3.92029	4.23181	4.1053	4.0858	0.127924	3.13095			P00742	56100.4	Coagulation factor X OS	2.19371	1.80861	1.7539	1.83769
P02747	26001.8	Complement C1q subcomponent subunit C OS	64.2411	52.9056	67.0549	61.4006	6.11567	9.96029	61.7397	42.4677	45.679	49.9621	8.43055	16.8739		25.4457	24.4782	27.142	25.6886	1.10098	4.28586	48.6554	44.1753	47.7622	46.8643	1.93606	4.1312		4.77115	14.585	5.21726	4.9942	0.223055	4.46628	8.3219	10.0869	10.4882	9.63234	0.940986	9.76903			P02747	26001.8	Complement C1q subcomponent subunit C OS	61.4006	49.9621	25.6886	46.8643
P02765	40123.1	Alpha-2-HS-glycoprotein OS	4.68353	4.1982	5.56421	4.81531	0.565402	11.7418	11.5257	7.79848	9.46535	9.59651	1.52445	15.8855		1.74376	2.13741	1.46723	1.7828	0.274985	15.4243	1.59421	1.44257	0.565438	1.51839	0.0758211	4.99353		0.104438	3.082	0.0667208	0.0855794	0.0188586	22.0364	0.0960745	0.229054	0.283275	0.202801	0.0786465	38.7801			P02765	40123.1	Alpha-2-HS-glycoprotein OS	4.81531	9.59651	1.7828	1.51839
P29622	48713.1	Kallistatin OS	77.9303	48.5153	78.647	78.2886	0.358331	0.457705	67.1783	39.9914	41.514	40.7527	0.761293	1.86808		48.9954	46.7618	50.2842	48.6805	1.45517	2.98923	45.0141	41.4944	44.0508	43.5198	1.48519	3.41268		40.3763	17.9301	40.3125	40.3444	0.0319217	0.0791231	35.4471	39.8164	40.5542	38.6059	2.25381	5.83798			P29622	48713.1	Kallistatin OS	78.2886	40.7527	48.6805	43.5198
Q8N5H3	20375.6	Protein FAM89B OS	8.4622	9.64811	10.2812	9.46385	0.753961	7.96675	8.5458	7.93418	8.4754	8.31846	0.273241	3.28475		5.81515	6.01913	6.58591	6.14006	0.326076	5.31064	6.45399	7.19109	7.45545	7.03351	0.423755	6.0248		7.36391	1.77642	16.1795	11.7717	4.40782	37.4441	7.89318	9.64043	8.78228	8.77196	0.713349	8.13215			Q8N5H3	20375.6	Protein FAM89B OS	9.46385	8.31846	6.14006	7.03351
O00217	24218.4	NADH dehydrogenase [ubiquinone] iron-sulfur protein 8_ mitochondrial OS	0.669902	9.7117	0.185292	0.427597	0.242305	56.6667	7.75253	6.13618	0.62779	4.83884	3.0499	63.0296		33.7814	10.5734	6.01556	8.29446	2.2789	27.475	3.31759	5.29152	10.5622	4.30455	0.986966	22.9284		0	0.0692858	0	0	0		0.0922504	0	0.00149184	0.000745922	0.000745922				O00217	24218.4	NADH dehydrogenase [ubiquinone] iron-sulfur protein 8_ mitochondrial OS	0.427597	4.83884	8.29446	4.30455
O14556	44843.4	Glyceraldehyde-3-phosphate dehydrogenase_ testis-specific OS	6.69176	5.27041	6.04297	6.00171	0.580996	9.68051	6.70875	6.11666	6.21675	6.34739	0.258766	4.07674		8.81202	7.62979	9.18098	8.54093	0.661648	7.74679	7.37255	6.42678	7.1768	6.99204	0.407609	5.82961		14.9305	2.23388	13.6837	14.3071	0.62339	4.35721	15.1543	15.1113	15.6933	15.3196	0.264802	1.72851			O14556	44843.4	Glyceraldehyde-3-phosphate dehydrogenase_ testis-specific OS	6.00171	6.34739	8.54093	6.99204
P02656	10852.3	Apolipoprotein C-III OS	3.13142	3.85545	3.91771	3.63486	0.356895	9.81868	3.16144	4.53063	4.73117	4.14108	0.697532	16.8442		1.88717	2.11043	1.64341	1.88034	0.190723	10.143	1.51569	1.34196	3.71475	2.1908	1.07993	49.2937		3.2633	45.2886	2.34794	2.80562	0.457681	16.313	4.36664	3.88703	4.12047	4.12471	0.195826	4.74763			P02656	10852.3	Apolipoprotein C-III OS	3.63486	4.14108	1.88034	2.1908
P02775	14179.4	Platelet basic protein OS	6.55231	6.33519	6.23635	6.37462	0.131969	2.07022	7.38206	6.62072	6.75765	6.92014	0.331377	4.78858		0.319226	0.4235	0.377674	0.373467	0.0426737	11.4264	0.344922	0.303247	0.357744	0.335304	0.0232645	6.93834		0	0.0970333	0.0503807	0.0251904	0.0251904	100	0.853002	0.903306	0.750204	0.835504	0.0637169	7.62616			P02775	14179.4	Platelet basic protein OS	6.37462	6.92014	0.373467	0.335304
P11226	26542.8	Mannose-binding protein C OS	2.22446	1.94229	2.19409	2.12028	0.126468	5.96471	1.63288	1.4227	1.24496	1.43351	0.158552	11.0604		1.8973	1.7054	1.80242	1.80171	0.0783418	4.3482	2.41478	2.3198	2.21617	2.31692	0.0811053	3.50057		8.20784	0.196861	6.83813	7.52298	0.684858	9.10354	5.23342	6.78338	6.8659	6.29423	0.750864	11.9294			P11226	26542.8	Mannose-binding protein C OS	2.12028	1.43351	1.80171	2.31692
P78562	87044.4	Phosphate-regulating neutral endopeptidase OS	21.6698	26.9761	25.6824	24.7761	2.25908	9.118	23.9702	19.3967	20.2447	21.2039	1.9865	9.36857		4.13757	4.15658	4.5459	4.28002	0.188167	4.3964	4.14006	4.2869	1.89493	4.21348	0.0734216	1.74254		0.503224	1.07687	0.317803	0.410514	0.0927106	22.584	0.0421843	0.544871	0.445226	0.495049	0.0498226	10.0642			P78562	87044.4	Phosphate-regulating neutral endopeptidase OS	24.7761	21.2039	4.28002	4.21348
P82650	41451.5	28S ribosomal protein S22_ mitochondrial OS	3.10602	3.75106	2.29164	3.04957	0.597141	19.5811	1.67526	3.24797	3.32716	2.75013	0.760734	27.6618		4.35498	4.71898	4.17129	4.41508	0.227598	5.15501	3.9829	4.30332	4.89556	4.39392	0.378059	8.60413		7.53282	1.87684	5.41684	6.47483	1.05799	16.34	7.02552	5.97043	5.43321	6.14305	0.661419	10.7669			P82650	41451.5	28S ribosomal protein S22_ mitochondrial OS	3.04957	2.75013	4.41508	4.39392
Q8IYF1	84605.3	Elongin-A2 OS	7.25103	4.82802	6.21078	6.09661	0.992481	16.2792	7.12039	4.53257	5.50193	5.7183	1.06749	18.6681		5.57617	5.08018	5.28774	5.3147	0.203382	3.82678	2.81945	2.92693	2.47543	2.74061	0.19257	7.02656		20.1319	0.422934	17.8673	18.9996	1.1323	5.95957	20.8965	18.6286	18.9497	19.4916	1.002	5.14066			Q8IYF1	84605.3	Elongin-A2 OS	6.09661	5.7183	5.3147	2.74061
		Total	3105.27	2916.56	3482.11	3172.64			2944.34	2359.6	2410.6	2515.71				3678.37	3633.04	3860.68	3708.95			3782.68	3686.62	4008.78	3824.96				5697.71	559.202	5641.22	5668.98			4619.99	5083.05	4923.91	4846.64							Tot	3172.64	2515.71	3708.95	3824.96
[truncated: 10 more columns]

## Sheet: Ranked+enrichment
						enrichment calculation: "1 IU/mL condition" divided by "no hep condition"
		% total protein identified	SDS-PS_COOH			% total protein identified	enricht in		% total protein identified	CTMA Cl-PS_NH2			% total protein identified	enricht in		% total protein identified	Lutensol-PS-NH2			% total protein identified	enricht in
		Description (90 proteins)	no_hep	1 IU/mL		Description (90 proteins)	1.0 IU/mL		Description (90 proteins)	no_hep	1 IU/mL		Description (90 proteins)	1.0 IU/mL		Description (90 proteins)	no_hep	1 IU/mL		Description (90 proteins)	1.0 IU/mL			70
	1	Complement C3 OS	10.2991	9.73192		NADH dehydrogenase [ubiquinone] iron-sulfur protein 8_ mitochondrial OS	14.2714		Serum albumin OS	40.4589	48.4292		Complement C1q subcomponent subunit B OS	1.90269		Clusterin OS	70.6768	69.659		Platelet basic protein OS	38.7953			50
	2	Beta-2-glycoprotein 1 OS	9.11496	10.0043		POTE ankyrin domain family member F OS	2.83954		Clusterin OS	8.82727	4.96582		Apolipoprotein E OS	1.84952		Apolipoprotein A-I OS	5.02988	7.29944		Alpha-2-HS-glycoprotein OS	2.77182			35
	3	Complement factor H OS	7.13328	7.06436		CD5 antigen-like OS	2.7992		Vitronectin OS	6.85221	4.8327		Complement C1q subcomponent subunit C OS	1.76899		Complement C3 OS	3.5491	1.67936		Coagulation factor XI OS	2.72768			20
	4	Clusterin OS	6.21655	6.1319		Alpha-2-HS-glycoprotein OS	2.51332		Apolipoprotein A-I OS	5.72959	6.98327		Beta-2-glycoprotein 1 OS	1.49215		Heparin cofactor 2 OS	2.86239	1.27372		Apolipoprotein D OS	2.32506			13
	5	Vitronectin OS	5.37488	5.90007		Properdin OS	2.25724		C4b-binding protein alpha chain OS	3.74759	1.54347		Hemopexin OS	1.37618		Serum albumin OS	1.67542	2.07705		Complement C1q subcomponent subunit C OS	2.25595			8
	6	Serum albumin OS	3.91213	3.72854		Histidine-rich glycoprotein OS	1.69397		Prothrombin OS	2.41153	2.75584		Apolipoprotein A-II OS	1.36873		Apolipoprotein L1 OS	1.4313	0.898243		Coagulation factor XII OS	2.23668			5
	7	Apolipoprotein A-I OS	3.85116	3.37298		Apolipoprotein D OS	1.60495		Apolipoprotein B-100 OS	2.30819	2.55317		Ig gamma-1 chain C region OS	1.29746		Alpha-1-antitrypsin OS	1.24032	1.81036		Lipopolysaccharide-binding protein OS	2.16506			2.5
	8	Kininogen-1 OS	3.84663	3.59548		Haptoglobin-related protein OS	1.55683		Apolipoprotein A-IV OS	2.26672	2.73297		Antithrombin-III OS	1.26542		Apolipoprotein B-100 OS	1.07689	1.02827		POTE ankyrin domain family member F OS	2.15756			1
	9	Inter-alpha-trypsin inhibitor heavy chain H4 OS	3.18687	3.16916		Ig lambda-2 chain C regions OS	1.53196		Ig mu chain C region OS	1.38086	1.20391		Mannose-binding protein C OS	1.24695		Apolipoprotein E OS	0.983756	0.954486		Inter-alpha-trypsin inhibitor heavy chain H2 OS	2.11256			0.7
	10	Ig kappa chain C region OS	2.90218	3.07368		Apolipoprotein L1 OS	1.49801		Kallistatin OS	1.31251	1.13778		Apolipoprotein A-I OS	1.21881		Vitronectin OS	0.772279	0.658286		Complement component C9 OS	2.04436			0.5
	11	Prothrombin OS	2.59497	2.6432		Tubulin--tyrosine ligase-like protein 12 OS	1.49578		Vitamin D-binding protein OS	1.30656	1.34215		Apolipoprotein A-IV OS	1.2057		Kallistatin OS	0.711669	0.79655		Complement C1r subcomponent OS	2.03238			0
	12	Kallistatin OS	2.46762	1.61993		Apolipoprotein C-III OS	1.43676		Complement C4-B OS	1.25623	1.23276		Serum amyloid P-component OS	1.1988		Plasminogen OS	0.594118	0.599582		Complement C1s subcomponent OS	1.98798
	13	Gelsolin OS	2.18249	2.56744		Ig gamma-2 chain C region OS	1.38074		Antithrombin-III OS	1.15863	1.46616		Serum albumin OS	1.197		Plasma protease C1 inhibitor OS	0.578088	0.666136		Thrombospondin-1 OS	1.97862
	14	Apolipoprotein A-IV OS	2.09644	1.6356		Haptoglobin OS	1.37607		Complement factor H-related protein 1 OS	1.05874	1.23425		Apolipoprotein D OS	1.19524		Apolipoprotein A-IV OS	0.535431	0.822942		Complement factor H-related protein 1 OS	1.78099
	15	Complement C1q subcomponent subunit C OS	1.93532	1.986		Platelet basic protein OS	1.36905		Complement C3 OS	1.03561	0.577828		Kinesin-like protein KIFC1 OS	1.17933		Ig gamma-1 chain C region OS	0.512357	0.554085		Complement C1q subcomponent subunit B OS	1.77225
	16	Complement C1q subcomponent subunit B OS	1.83164	1.71701		Glyceraldehyde-3-phosphate dehydrogenase_ testis-specific OS	1.33377		Ig kappa chain C region OS	1.02799	0.4579		Lipopolysaccharide-binding protein OS	1.17543		Hemopexin OS	0.464699	0.464717		Kinesin-like protein KIFC1 OS	1.74125
	17	C4b-binding protein alpha chain OS	1.74575	1.1852		Coagulation factor XII OS	1.30485		Apolipoprotein E OS	0.907014	1.67754		Complement factor H-related protein 1 OS	1.16578		Plasma kallikrein OS	0.455962	0.42247		Apolipoprotein M OS	1.729
	18	Complement C5 OS	1.47086	1.30007		Apolipoprotein M OS	1.29724		Plasma protease C1 inhibitor OS	0.841665	0.64213		Prothrombin OS	1.14278		Complement C4-B OS	0.361589	0.418775		Apolipoprotein C-III OS	1.71961
	19	Ig mu chain C region OS	1.39309	1.17993		Plasma serine protease inhibitor OS	1.29543		Inter-alpha-trypsin inhibitor heavy chain H2 OS	0.718536	0.698783		Apolipoprotein C-III OS	1.12977		Insulin-like growth factor-binding protein complex acid labile subunit OS	0.344184	0.388001		Ig lambda-2 chain C regions OS	1.68588
	20	Ig gamma-1 chain C region OS	1.266	1.24871		Heparin cofactor 2 OS	1.28227		Ig lambda-2 chain C regions OS	0.709894	0.67211		Protein FAM89B OS	1.11077		Elongin-A2 OS	0.335151	0.402167		Complement component C7 OS	1.61152
	21	Complement factor B OS	1.07349	1.03657		Lipopolysaccharide-binding protein OS	1.27773		Complement C1q subcomponent subunit C OS	0.692613	1.22522		Apolipoprotein B-100 OS	1.10614		Hemoglobin subunit beta OS	0.307258	0.400795		Beta-2-glycoprotein 1 OS	1.6072
	22	Antithrombin-III OS	1.03621	0.718145		Complement factor H-related protein 5 OS	1.25321		Complement component C9 OS	0.6866	0.564471		Complement component C7 OS	1.09488		Complement factor H OS	0.281774	0.266171		Apolipoprotein A-II OS	1.60491
	23	Fibronectin OS	1.03553	1.05236		Hyaluronan-binding protein 2 OS	1.23382		Alpha-1-antitrypsin OS	0.664752	0.354237		Complement factor H OS	1.081		Phospholipid transfer protein OS	0.260497	0.278216		Lumican OS	1.57516
	24	Plasma protease C1 inhibitor OS	0.969539	0.863747		Transthyretin OS	1.18624		Complement C4-A OS	0.662845	0.650464		Phospholipid transfer protein OS	1.06912		Glyceraldehyde-3-phosphate dehydrogenase_ testis-specific OS	0.252375	0.316087		Haptoglobin-related protein OS	1.56083
	25	Alpha-1-antitrypsin OS	0.967914	1.04837		Elongin-A2 OS	1.18287		Ig gamma-1 chain C region OS	0.650612	0.844145		Insulin-like growth factor-binding protein complex acid labile subunit OS	1.03995		Antithrombin-III OS	0.239722	0.283645		Apolipoprotein A-IV OS	1.53697
	26	Apolipoprotein E OS	0.815374	0.796169		Actin_ cytoplasmic 1 OS	1.18066		Kininogen-1 OS	0.565863	0.566872		Vitamin D-binding protein OS	1.02724		Gelsolin OS	0.237014	0.248762		Tubulin--tyrosine ligase-like protein 12 OS	1.50687
	27	Complement C1s subcomponent OS	0.802658	0.85865		Vitamin D-binding protein OS	1.17853		Lumican OS	0.543671	0.500858		Coagulation factor X OS	1.016		Complement factor H-related protein 1 OS	0.228685	0.407286		Haptoglobin OS	1.47577
	28	Phosphate-regulating neutral endopeptidase OS	0.78093	0.842858		Gelsolin OS	1.17638		Heparin cofactor 2 OS	0.526013	0.477567		Kininogen-1 OS	1.00178		Kininogen-1 OS	0.211605	0.247629		Alpha-1-antitrypsin OS	1.4596
	29	Apolipoprotein B-100 OS	0.755058	0.632487		28S ribosomal protein S22_ mitochondrial OS	1.1373		Plasminogen OS	0.46674	0.465488		Plasminogen OS	0.997318		Selenoprotein P OS	0.207749	0.221816		Apolipoprotein A-I OS	1.45122
	30	Ig alpha-1 chain C region OS	0.735278	0.744123		Coagulation factor IX OS	1.13346		Haptoglobin OS	0.436339	0.32103		Complement C4-B OS	0.981322		Protein FAM89B OS	0.207652	0.180991		Hyaluronan-binding protein 2 OS	1.44107
		Histidine-rich glycoprotein OS	0.70135	1.18807		Lumican OS	1.11216		Complement component C7 OS	0.434473	0.475695		Complement C4-A OS	0.981322		Ig mu chain C region OS	0.199855	0.247709		Ig gamma-2 chain C region OS	1.43624
		Complement C1r subcomponent OS	0.685906	0.717884		Protein FAM89B OS	1.1085		Inter-alpha-trypsin inhibitor heavy chain H4 OS	0.427447	0.317071		Inter-alpha-trypsin inhibitor heavy chain H2 OS	0.97251		Complement C4-A OS	0.190792	0.220966		Phosphate-regulating neutral endopeptidase OS	1.41054
		Complement component C7 OS	0.673034	0.475964		Vitronectin OS	1.09771		Ig alpha-1 chain C region OS	0.420784	0.184516		28S ribosomal protein S22_ mitochondrial OS	0.965023		Inter-alpha-trypsin inhibitor heavy chain H4 OS	0.17979	0.195337		Actin_ cytoplasmic 1 OS	1.33313
		Protein AMBP OS	0.660573	0.345994		Beta-2-glycoprotein 1 OS	1.09757		Gelsolin OS	0.413185	0.309243		Coagulation factor XI OS	0.962306		Vitamin D-binding protein OS	0.167782	0.185502		Hemoglobin subunit beta OS	1.30442
		Complement factor H-related protein 1 OS	0.645977	0.55165		Coagulation factor XI OS	1.09585		Beta-2-glycoprotein 1 OS	0.378657	0.565013		Phosphate-regulating neutral endopeptidase OS	0.954596		Prothrombin OS	0.166414	0.13033		Glyceraldehyde-3-phosphate dehydrogenase_ testis-specific OS	1.25245
		Ig lambda-2 chain C regions OS	0.599837	0.918928		Inter-alpha-trypsin inhibitor heavy chain H2 OS	1.08332		Complement C1s subcomponent OS	0.366928	0.183981		Ig lambda-2 chain C regions OS	0.946774		Ig gamma-3 chain C region OS	0.148433	0.0978072		Fibronectin OS	1.24023
		Inter-alpha-trypsin inhibitor heavy chain H2 OS	0.571588	0.619211		Alpha-1-antitrypsin OS	1.08312		Hemopexin OS	0.3404	0.468451		Plasma serine protease inhibitor OS	0.941528		Protein AMBP OS	0.146187	0.153216		Serum albumin OS	1.23972
		Complement C4-B OS	0.557316	0.59985		Phosphate-regulating neutral endopeptidase OS	1.0793		Tubulin--tyrosine ligase-like protein 12 OS	0.301626	0.0401141		Lumican OS	0.921252		Mannose-binding protein C OS	0.132704	0.129868		Ig mu chain C region OS	1.23944
		Plasminogen OS	0.526603	0.459552		Complement C4-B OS	1.07632		Apolipoprotein L1 OS	0.287256	0.183637		Heparin cofactor 2 OS	0.907899		Complement component C7 OS	0.132633	0.213742		Ig alpha-1 chain C region OS	1.21497
		Serum amyloid P-component OS	0.525168	0.497052		Complement C4-A OS	1.07632		Transthyretin OS	0.278702	0.118922		Protein AMBP OS	0.901673		Ig kappa chain C region OS	0.131266	0.157706		Ig kappa chain C region OS	1.20142
		Hemopexin OS	0.49551	0.500307		Complement component C9 OS	1.07386		Vitamin K-dependent protein S OS	0.266425	0.0979559		Ig gamma-3 chain C region OS	0.888997		Hyaluronan-binding protein 2 OS	0.125704	0.181148		Elongin-A2 OS	1.19996
		Vitamin D-binding protein OS	0.483339	0.569629		Complement C1s subcomponent OS	1.06976		Insulin-like growth factor-binding protein complex acid labile subunit OS	0.257505	0.267794		Ig mu chain C region OS	0.871856		Fibronectin OS	0.124798	0.154778		Antithrombin-III OS	1.18323
		Ig gamma-3 chain C region OS	0.483003	0.515879		Thrombospondin-1 OS	1.06892		Thrombospondin-1 OS	0.251555	0.123814		Platelet basic protein OS	0.870586		28S ribosomal protein S22_ mitochondrial OS	0.114215	0.126749		C4b-binding protein alpha chain OS	1.17158
		Inter-alpha-trypsin inhibitor heavy chain H1 OS	0.460449	0.474335		Ig gamma-3 chain C region OS	1.06807		Selenoprotein P OS	0.250506	0.206835		Kallistatin OS	0.866875		C4b-binding protein alpha chain OS	0.107582	0.126042		Vitamin K-dependent protein S OS	1.17107
		Complement component C6 OS	0.430959	0.451372		Ig kappa chain C region OS	1.05909		Hyaluronan-binding protein 2 OS	0.240884	0.192733		Alpha-2-HS-glycoprotein OS	0.825855		Complement C1q subcomponent subunit C OS	0.0880969	0.198743		Kininogen-1 OS	1.17025
		Haptoglobin OS	0.407213	0.560353		Complement component C6 OS	1.04737		Complement C1r subcomponent OS	0.24049	0.123132		Selenoprotein P OS	0.825667		Ig lambda-2 chain C regions OS	0.0824127	0.138938		Complement C4-B OS	1.15815
		Vitamin K-dependent protein S OS	0.394491	0.320691		Complement C1r subcomponent OS	1.04662		Plasma kallikrein OS	0.235714	0.182968		Complement component C9 OS	0.822124		Coagulation factor X OS	0.0775806	0.0843017		Complement C4-A OS	1.15815
		Plasma kallikrein OS	0.390897	0.356483		Coagulation factor X OS	1.03974		Glyceraldehyde-3-phosphate dehydrogenase_ testis-specific OS	0.230279	0.182801		Alpha-2-macroglobulin OS	0.821631		Haptoglobin OS	0.0756057	0.111577		Plasma protease C1 inhibitor OS	1.15231
		Complement component C9 OS	0.369692	0.396996		Apolipoprotein A-II OS	1.03255		NADH dehydrogenase [ubiquinone] iron-sulfur protein 8_ mitochondrial OS	0.223634	0.112539		Complement C5 OS	0.817569		Apolipoprotein A-II OS	0.0731379	0.117379		Insulin-like growth factor-binding protein complex acid labile subunit OS	1.12731
		Tubulin--tyrosine ligase-like protein 12 OS	0.304956	0.456149		Inter-alpha-trypsin inhibitor heavy chain H1 OS	1.03016		Phospholipid transfer protein OS	0.212498	0.227185		Complement factor H-related protein 5 OS	0.808567		Plasma serine protease inhibitor OS	0.0709673	0.0486159		Transthyretin OS	1.12241
		Protein FAM89B OS	0.298296	0.33066		Complement C1q subcomponent subunit C OS	1.02619		Haptoglobin-related protein OS	0.178439	0.126101		Apolipoprotein M OS	0.801498		Haptoglobin-related protein OS	0.0665231	0.103831		Kallistatin OS	1.11927
		Complement C4-A OS	0.294066	0.31651		Complement component C8 alpha chain OS	1.02384		Complement factor H OS	0.176623	0.190929		Hyaluronan-binding protein 2 OS	0.800107		Inter-alpha-trypsin inhibitor heavy chain H2 OS	0.0631082	0.13332		28S ribosomal protein S22_ mitochondrial OS	1.10974
		Hemoglobin subunit beta OS	0.293709	0.267537		Prothrombin OS	1.01859		Protein FAM89B OS	0.165547	0.183885		Glyceraldehyde-3-phosphate dehydrogenase_ testis-specific OS	0.793822		Ig alpha-1 chain C region OS	0.0593793	0.0721439		Vitamin D-binding protein OS	1.10561
		Insulin-like growth factor-binding protein complex acid labile subunit OS	0.277212	0.278621		Fibronectin OS	1.01625		Hemoglobin subunit beta OS	0.151821	0.10728		Plasma kallikrein OS	0.776229		Lumican OS	0.0593745	0.0935242		Coagulation factor X OS	1.08663
		Heparin cofactor 2 OS	0.274612	0.352128		Ig alpha-1 chain C region OS	1.01203		Ig gamma-3 chain C region OS	0.144178	0.128174		Plasma protease C1 inhibitor OS	0.762928		Complement factor B OS	0.0571196	0.0362448		Inter-alpha-trypsin inhibitor heavy chain H4 OS	1.08647
		Selenoprotein P OS	0.269353	0.253699		Hemopexin OS	1.00968		Elongin-A2 OS	0.143294	0.0716506		Gelsolin OS	0.748437		Complement component C6 OS	0.0498373	0.0529243		Ig gamma-1 chain C region OS	1.08144
		Transthyretin OS	0.25045	0.297095		Insulin-like growth factor-binding protein complex acid labile subunit OS	1.00509		Apolipoprotein A-II OS	0.141356	0.193479		Inter-alpha-trypsin inhibitor heavy chain H4 OS	0.741779		Apolipoprotein C-III OS	0.0494907	0.0851046		Phospholipid transfer protein OS	1.06802
		Phospholipid transfer protein OS	0.247053	0.244126		Alpha-2-macroglobulin OS	1.0025		Fibronectin OS	0.138759	0.0647066		Haptoglobin OS	0.735734		Beta-2-glycoprotein 1 OS	0.0489081	0.0786049		Selenoprotein P OS	1.06771
		Plasma serine protease inhibitor OS	0.224897	0.291338		Inter-alpha-trypsin inhibitor heavy chain H4 OS	0.994443		Complement component C6 OS	0.136383	0.0706272		Haptoglobin-related protein OS	0.70669		Complement C5 OS	0.0472028	0.0216523		Complement component C6 OS	1.06194
		Hyaluronan-binding protein 2 OS	0.201188	0.24823		Complement factor H OS	0.990338		Protein AMBP OS	0.126088	0.11369		Hemoglobin subunit beta OS	0.70662		Complement C1s subcomponent OS	0.0448911	0.0892425		Gelsolin OS	1.04957
		Platelet basic protein OS	0.200925	0.275077		Phospholipid transfer protein OS	0.988155		28S ribosomal protein S22_ mitochondrial OS	0.119039	0.114875		Vitronectin OS	0.705275		Actin_ cytoplasmic 1 OS	0.0400387	0.0533767		Protein AMBP OS	1.04808
		Elongin-A2 OS	0.192162	0.227303		Clusterin OS	0.986383		Phosphate-regulating neutral endopeptidase OS	0.115397	0.110158		Apolipoprotein L1 OS	0.63928		Complement component C9 OS	0.0316262	0.0646555		Coagulation factor IX OS	1.01879
		Glyceraldehyde-3-phosphate dehydrogenase_ testis-specific OS	0.189171	0.25231		Ig gamma-1 chain C region OS	0.986346		Inter-alpha-trypsin inhibitor heavy chain H1 OS	0.114134	0.0592141		Coagulation factor IX OS	0.580777		Transthyretin OS	0.0273145	0.030658		Plasminogen OS	1.0092
		Coagulation factor XII OS	0.187405	0.244535		Apolipoprotein E OS	0.976446		POTE ankyrin domain family member F OS	0.0896295	0.0241702		Complement factor B OS	0.577678		Complement C1r subcomponent OS	0.0258434	0.0525235		Hemopexin OS	1.00004
		Thrombospondin-1 OS	0.184176	0.196869		Complement factor B OS	0.965611		Complement factor B OS	0.0821524	0.0474576		Clusterin OS	0.562554		POTE ankyrin domain family member F OS	0.0227213	0.0490225		Clusterin OS	0.985599
		Apolipoprotein L1 OS	0.183773	0.275293		Serum albumin OS	0.953071		Complement C5 OS	0.0757302	0.0619147		Complement C3 OS	0.55796		Kinesin-like protein KIFC1 OS	0.0205545	0.0357905		Mannose-binding protein C OS	0.978626
		Haptoglobin-related protein OS	0.170048	0.264736		Serum amyloid P-component OS	0.946463		Complement C1q subcomponent subunit B OS	0.0756865	0.144008		Alpha-1-antitrypsin OS	0.532886		Alpha-2-macroglobulin OS	0.0172412	0.0168639		Alpha-2-macroglobulin OS	0.978118
		Lipopolysaccharide-binding protein OS	0.169507	0.216584		Complement C3 OS	0.944931		Kinesin-like protein KIFC1 OS	0.0659128	0.0777328		Inter-alpha-trypsin inhibitor heavy chain H1 OS	0.51881		Ig gamma-2 chain C region OS	0.0161255	0.02316		Apolipoprotein E OS	0.970247
		POTE ankyrin domain family member F OS	0.165791	0.470769		Selenoprotein P OS	0.941883		Ig gamma-2 chain C region OS	0.0571858	0.0287159		Complement component C6 OS	0.517858		Apolipoprotein M OS	0.0155421	0.0268723		Apolipoprotein B-100 OS	0.954851
		Ig gamma-2 chain C region OS	0.164514	0.227151		Complement C1q subcomponent subunit B OS	0.937417		Plasma serine protease inhibitor OS	0.0524783	0.0494098		Complement C1r subcomponent OS	0.512006		Vitamin K-dependent protein S OS	0.012311	0.014417		Complement factor H OS	0.944627
		Alpha-2-HS-glycoprotein OS	0.151776	0.381463		Kininogen-1 OS	0.934708		Apolipoprotein C-III OS	0.0506973	0.0572764		NADH dehydrogenase [ubiquinone] iron-sulfur protein 8_ mitochondrial OS	0.503227		Lipopolysaccharide-binding protein OS	0.0094094	0.0203719		Plasma kallikrein OS	0.926546
		Lumican OS	0.143882	0.160019		Plasma kallikrein OS	0.911962		Mannose-binding protein C OS	0.0485773	0.0605736		Ig gamma-2 chain C region OS	0.50215		Inter-alpha-trypsin inhibitor heavy chain H1 OS	0.00850171	0.00560978		Complement factor H-related protein 5 OS	0.887339
		Complement component C8 alpha chain OS	0.135156	0.138378		Hemoglobin subunit beta OS	0.910889		Alpha-2-HS-glycoprotein OS	0.0480676	0.0396969		Complement C1s subcomponent OS	0.50141		Phosphate-regulating neutral endopeptidase OS	0.0072414	0.0102143		Protein FAM89B OS	0.871608
		Complement factor H-related protein 5 OS	0.134705	0.168813		Plasma protease C1 inhibitor OS	0.890884		Coagulation factor X OS	0.0472884	0.0480448		Elongin-A2 OS	0.500026		Tubulin--tyrosine ligase-like protein 12 OS	0.00699824	0.0105454		Vitronectin OS	0.852394
		Coagulation factor IX OS	0.121096	0.137257		Complement C5 OS	0.883884		Coagulation factor IX OS	0.0396329	0.0230179		Coagulation factor XII OS	0.497095		Serum amyloid P-component OS	0.00631791	0.00324917		Prothrombin OS	0.783166
		Apolipoprotein C-III OS	0.114569	0.164609		Apolipoprotein A-I OS	0.875836		Coagulation factor XI OS	0.0268849	0.0258715		Thrombospondin-1 OS	0.492195		Complement C1q subcomponent subunit B OS	0.0045351	0.00803732		Plasma serine protease inhibitor OS	0.685046
		28S ribosomal protein S22_ mitochondrial OS	0.096121	0.109318		Plasminogen OS	0.872673		Apolipoprotein M OS	0.0207838	0.0166581		Histidine-rich glycoprotein OS	0.478325		Coagulation factor IX OS	0.00426357	0.00434367		Inter-alpha-trypsin inhibitor heavy chain H1 OS	0.659841
		Coagulation factor XI OS	0.0890182	0.0975506		Complement factor H-related protein 1 OS	0.853978		Alpha-2-macroglobulin OS	0.0199488	0.0163905		Fibronectin OS	0.466326		Coagulation factor XI OS	0.00377495	0.0102969		Ig gamma-3 chain C region OS	0.65893
		Coagulation factor X OS	0.0691446	0.0718925		Mannose-binding protein C OS	0.852645		Serum amyloid P-component OS	0.0163521	0.019603		Ig kappa chain C region OS	0.445435		Apolipoprotein D OS	0.00369686	0.0085954		Complement factor B OS	0.634542
		Mannose-binding protein C OS	0.0668301	0.0569824		Ig mu chain C region OS	0.846986		Complement factor H-related protein 5 OS	0.0130676	0.010566		Ig alpha-1 chain C region OS	0.438506		Complement factor H-related protein 5 OS	0.00260584	0.00231226		Apolipoprotein L1 OS	0.627571
		Apolipoprotein A-II OS	0.0521242	0.0538211		Apolipoprotein B-100 OS	0.837666		Lipopolysaccharide-binding protein OS	0.0121917	0.0143305		Transthyretin OS	0.4267		Coagulation factor XII OS	0.00193174	0.0043207		Serum amyloid P-component OS	0.51428
		Kinesin-like protein KIFC1 OS	0.0510457	0.0409115		Vitamin K-dependent protein S OS	0.812924		Platelet basic protein OS	0.0100693	0.00876623		C4b-binding protein alpha chain OS	0.411856		Alpha-2-HS-glycoprotein OS	0.00150961	0.00418437		Complement C3 OS	0.473178
		Apolipoprotein M OS	0.0501048	0.0649979		Kinesin-like protein KIFC1 OS	0.801468		Apolipoprotein D OS	0.0100684	0.0120342		Properdin OS	0.37851		Thrombospondin-1 OS	0.00104558	0.00206881		Complement C5 OS	0.458707
		Properdin OS	0.0322323	0.0727561		Apolipoprotein A-IV OS	0.780181		Complement component C8 alpha chain OS	0.00392487	0		CD5 antigen-like OS	0.376089		Histidine-rich glycoprotein OS	0.000627609	0		Heparin cofactor 2 OS	0.444984
		Alpha-2-macroglobulin OS	0.0275086	0.0275774		Complement component C7 OS	0.707192		Properdin OS	0.00310259	0.00117436		Vitamin K-dependent protein S OS	0.367668		Platelet basic protein OS	0.000444354	0.0172388		Histidine-rich glycoprotein OS	0
		CD5 antigen-like OS	0.0243415	0.0681367		Antithrombin-III OS	0.69305		Histidine-rich glycoprotein OS	0.00297005	0.00142065		POTE ankyrin domain family member F OS	0.269668		Complement component C8 alpha chain OS	0.000261984	0		Complement component C8 alpha chain OS	0
		Actin_ cytoplasmic 1 OS	0.0137272	0.0162071		C4b-binding protein alpha chain OS	0.678906		Coagulation factor XII OS	0.00232425	0.00115537		Tubulin--tyrosine ligase-like protein 12 OS	0.132993		CD5 antigen-like OS	0	0.00121511		CD5 antigen-like OS	#DIV/0!
		NADH dehydrogenase [ubiquinone] iron-sulfur protein 8_ mitochondrial OS	0.0134777	0.192345		Kallistatin OS	0.656474		CD5 antigen-like OS	0.00200379	0.000753604		Complement component C8 alpha chain OS	0		Properdin OS	0	0.00795237		Properdin OS	#DIV/0!
		Apolipoprotein D OS	0.0130964	0.021019		Protein AMBP OS	0.523779		Actin_ cytoplasmic 1 OS	0.0010224	0		Actin_ cytoplasmic 1 OS	0		NADH dehydrogenase [ubiquinone] iron-sulfur protein 8_ mitochondrial OS	0	1.53905e-05		NADH dehydrogenase [ubiquinone] iron-sulfur protein 8_ mitochondrial OS	#DIV/0!

## Sheet: Figure S9
				SDS-PS_COOH				CTMA Cl-PS_NH2				Lutensol-PS-NH2
				no_hep	1 IU/mL			no_hep	1 IU/mL			no_hep	1 IU/mL
	70		Complement C3	10.2991	9.73192		Serum albumin	40.4589	48.4292		Clusterin	70.6768	69.659
	50		Beta-2-glycoprotein 1	9.11496	10.0043		Clusterin	8.82727	4.96582		Apolipoprotein A-I	5.02988	7.29944
	35		Complement factor H	7.13328	7.06436		Vitronectin	6.85221	4.8327		Complement C3	3.5491	1.67936
	20		Clusterin	6.21655	6.1319		Apolipoprotein A-I	5.72959	6.98327		Heparin cofactor 2	2.86239	1.27372
	13		Vitronectin	5.37488	5.90007		C4b-binding protein alpha chain	3.74759	1.54347		Serum albumin	1.67542	2.07705
	8		Serum albumin	3.91213	3.72854		Prothrombin	2.41153	2.75584		Apolipoprotein L1	1.4313	0.898243
	5		Apolipoprotein A-I	3.85116	3.37298		Apolipoprotein B-100	2.30819	2.55317		Alpha-1-antitrypsin	1.24032	1.81036
	3		Kininogen-1	3.84663	3.59548		Apolipoprotein A-IV	2.26672	2.73297		Apolipoprotein B-100	1.07689	1.02827
	1.5		Inter-alpha-trypsin inhibitor heavy chain H4	3.18687	3.16916		Ig mu chain C region	1.38086	1.20391		Apolipoprotein E	0.983756	0.954486
	1		Ig kappa chain C region	2.90218	3.07368		Kallistatin	1.31251	1.13778		Vitronectin	0.772279	0.658286
	0.5		Prothrombin	2.59497	2.6432		Vitamin D-binding protein	1.30656	1.34215		Kallistatin	0.711669	0.79655
	0		Kallistatin	2.46762	1.61993		Complement C4-B	1.25623	1.23276		Plasminogen	0.594118	0.599582
			Gelsolin	2.18249	2.56744		Antithrombin-III	1.15863	1.46616		Plasma protease C1 inhibitor	0.578088	0.666136
			Apolipoprotein A-IV	2.09644	1.6356		Complement factor H-related protein 1	1.05874	1.23425		Apolipoprotein A-IV	0.535431	0.822942
			Complement C1q subcomponent subunit C	1.93532	1.986		Complement C3	1.03561	0.577828		Ig gamma-1 chain C region	0.512357	0.554085
			Complement C1q subcomponent subunit B	1.83164	1.71701		Ig kappa chain C region	1.02799	0.4579		Hemopexin	0.464699	0.464717
			C4b-binding protein alpha chain	1.74575	1.1852		Apolipoprotein E	0.907014	1.67754		Plasma kallikrein	0.455962	0.42247
			Complement C5	1.47086	1.30007		Plasma protease C1 inhibitor	0.841665	0.64213		Complement C4-B	0.361589	0.418775
			Ig mu chain C region	1.39309	1.17993		Inter-alpha-trypsin inhibitor heavy chain H2	0.718536	0.698783		Insulin-like growth factor-binding protein	0.344184	0.388001
			Ig gamma-1 chain C region	1.266	1.24871		Ig lambda-2 chain C regions	0.709894	0.67211		Elongin-A2	0.335151	0.402167
